# Supplementary material
Source: PubMed Central journal article supplement (PMC4140596)
Supplement: cn500113c_si_001.pdf [file cn500113c_si_001.pdf]

## Supporting Information for:

# Identification of Neuropeptide S Antagonists: Structure-Activity Relationship Studies, X-Ray Crystallography, and In vivo Evaluation

*Carla Hassler<sup>§</sup>, Yanan Zhang<sup>§</sup>, Brian Gilmour<sup>§</sup>, Tyler Graf<sup>§</sup>, Tim Fennell<sup>§</sup>, Rod Snyder<sup>§</sup>, Jeffrey  
Deschamps\*, Rainer Reinscheid<sup>†</sup>, Celia Garau<sup>†</sup>, and Scott P. Runyon<sup>§</sup>*

<sup>§</sup>Research Triangle Institute, Post Office Box 12194, Research Triangle Park, NC 27709-2194,  
United States

<sup>†</sup>University of California, Irvine, Department of Pharmaceutical Sciences, 2214 Natural Sciences I, Mail  
Code: 3958, Irvine, CA 92697-3958, United States

\*Center for Bio/Molecular Science and Engineering, Naval Research Laboratory, Code 6930,  
4555 Overlook Avenue SW, Washington, DC 20375, United States

## Table of Contents:

|                                            |            |
|--------------------------------------------|------------|
| <b>-Chiral HPLC Chromatograms</b>          | <b>S2</b>  |
| <b>-Table S1 with ESI MS spectral data</b> | <b>S8</b>  |
| <b>-<sup>1</sup>H NMR spectra</b>          | <b>S10</b> |
| <b>-RP HPLC Chromatograms</b>              | <b>S24</b> |

A: SHA-68 (1) Racemate

Peak results :

| Index | Name    | Time [Min] | Quantity [% Area] | Height [mAU] | Area [mAU.Min] | Area % [%] |
|-------|---------|------------|-------------------|--------------|----------------|------------|
| 1     | UNKNOWN | 3.07       | 0.05              | 16.4         | 1.8            | 0.052      |
| 2     | UNKNOWN | 4.69       | 0.04              | 11.6         | 1.3            | 0.038      |
| 3     | UNKNOWN | 4.93       | 0.11              | 34.5         | 3.6            | 0.106      |
| 4     | UNKNOWN | 8.17       | 1.00              | 170.8        | 34.3           | 1.002      |
| 5     | UNKNOWN | 11.47      | 50.14             | 3273.7       | 1717.4         | 50.140     |
| 6     | UNKNOWN | 14.77      | 48.66             | 2398.1       | 1666.8         | 48.662     |
|       |         |            |                   |              |                |            |
| Total |         |            | 100.00            | 5905.2       | 3425.3         | 100.000    |

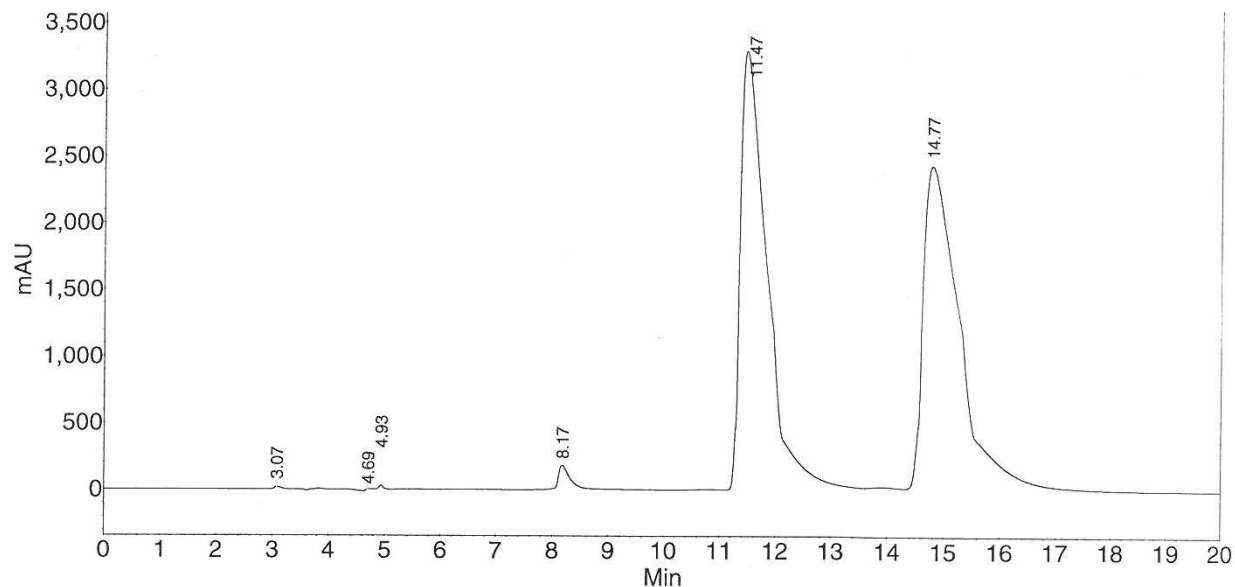

B: 31, (S)-(-) Enantiomer; Peak 1

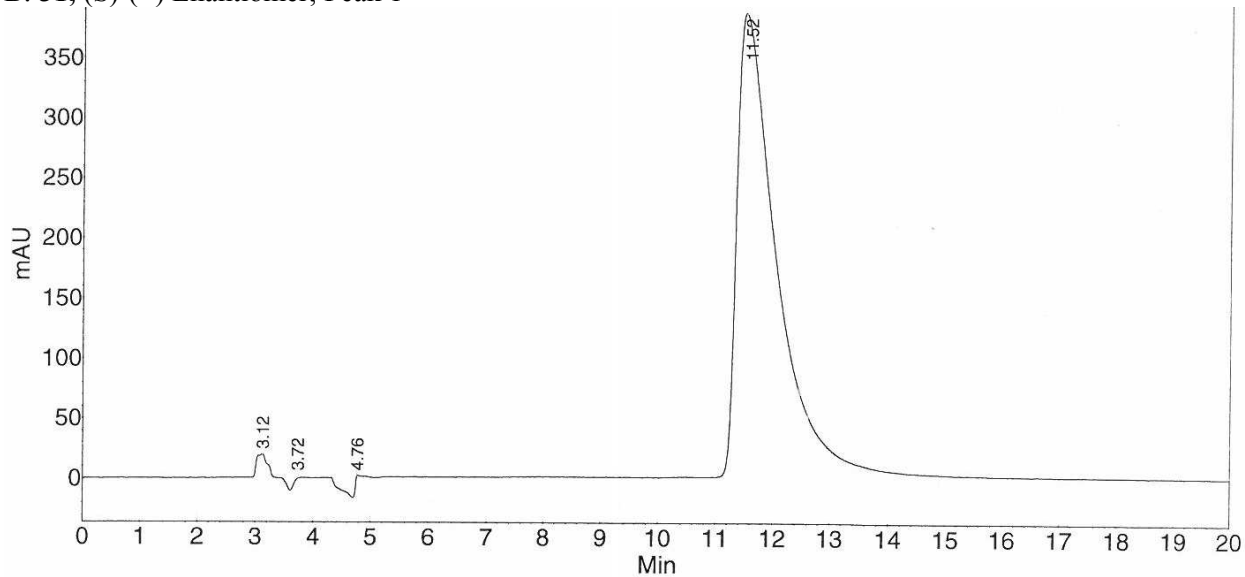

C: **32**; (R)-(+ Enantiomer; Peak 2

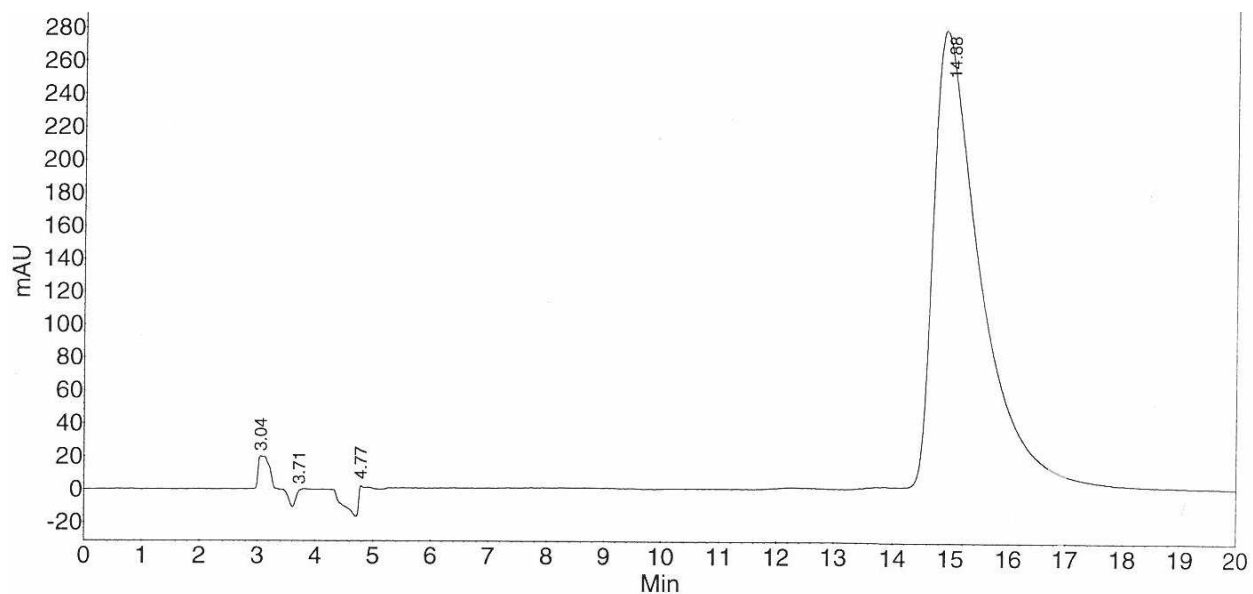

Figure 5: HPLC Chromatograms of SHA-68 (**1**) (A), **31** (S)-(-) Enantiomer; Peak 1 (B), and **32** (R)-(+ Enantiomer; Peak 2 (C) on chiral column (NP; Chiralpak IA, IPA/hexanes 1/9) recorded at 204 nm)

A: RTI-118 (2) Racemate

Peak results :

| Index | Name    | Time [Min] | Quantity [% Area] | Height [mAU] | Area [mAU.Min] | Area % [%] |
|-------|---------|------------|-------------------|--------------|----------------|------------|
| 1     | UNKNOWN | 0.12       | 0.00              | 0.0          | 0.0            | 0.004      |
| 2     | UNKNOWN | 3.07       | 0.20              | 1.3          | 0.1            | 0.202      |
| 3     | UNKNOWN | 3.23       | 0.25              | 1.4          | 0.2            | 0.248      |
| 4     | UNKNOWN | 3.36       | 0.30              | 1.5          | 0.2            | 0.298      |
| 5     | UNKNOWN | 4.24       | 0.90              | 5.1          | 0.6            | 0.899      |
| 6     | UNKNOWN | 4.81       | 1.56              | 7.5          | 1.0            | 1.557      |
| 7     | UNKNOWN | 4.96       | 0.85              | 2.4          | 0.6            | 0.846      |
| 8     | UNKNOWN | 8.64       | 0.35              | 0.8          | 0.2            | 0.350      |
| 9     | UNKNOWN | 8.91       | 0.09              | 0.4          | 0.1            | 0.087      |
| 10    | UNKNOWN | 10.45      | 46.67             | 30.9         | 30.5           | 46.667     |
| 11    | UNKNOWN | 12.67      | 48.84             | 28.7         | 31.9           | 48.843     |
| Total |         |            | 100.00            | 80.0         | 65.4           | 100.000    |

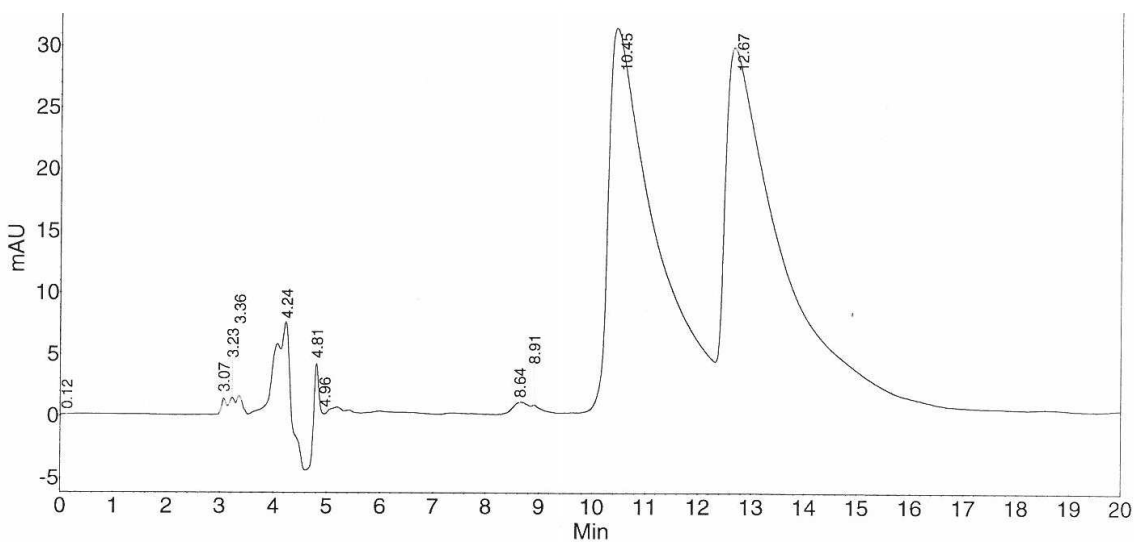

B: 33, (S)(-) Enantiomer; Peak 1

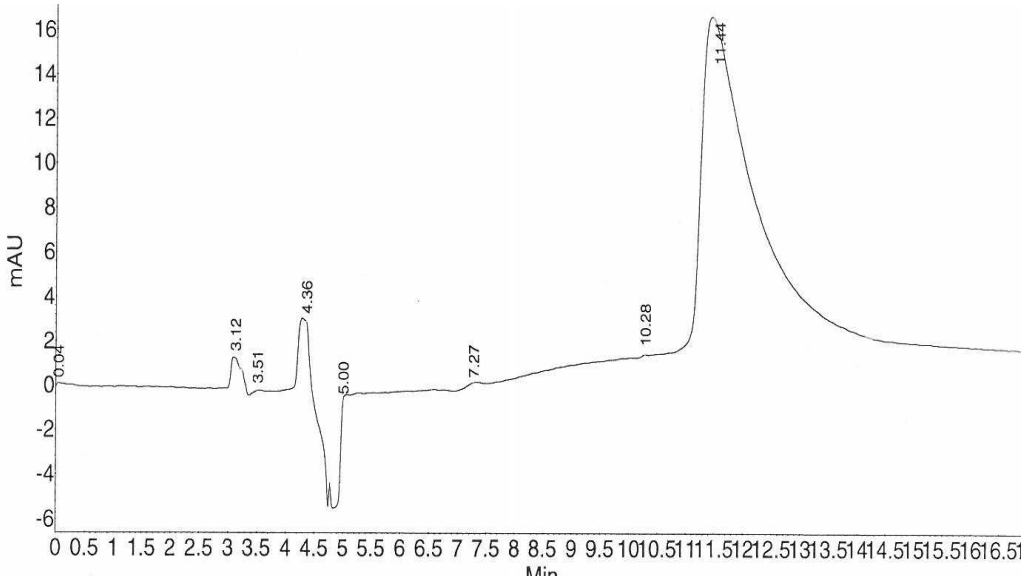

C: **34**; (R)-(+ Enantiomer; Peak 2

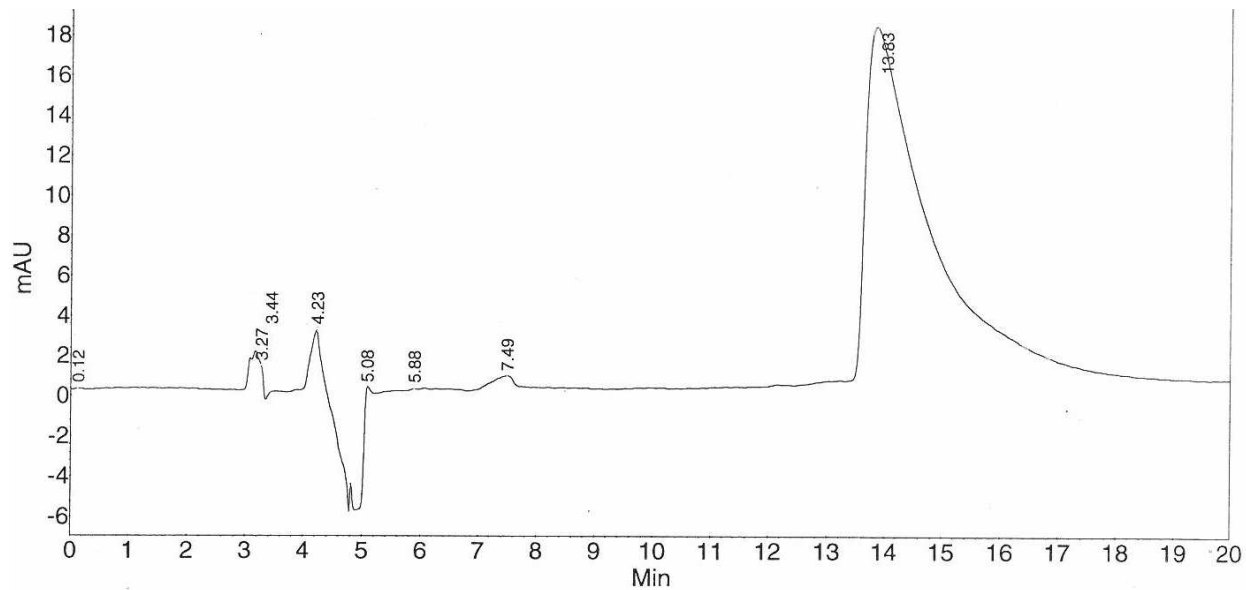

Figure 6: HPLC Chromatograms of RTI-118 (**2**) (A), **33** (S)-(-) Enantiomer; Peak 1 (B), and **34** (R)-(+ Enantiomer; Peak 2 (C) on chiral column (NP; Chiralpak IA, hexanes/IPA/DEA 9/1/0.1) recorded at 258 nm)

A: 37, Racemate

Peak results :

| Index | Name    | Time [Min] | Quantity [% Area] | Height [mAU] | Area [mAU.Min] | Area % [%] |
|-------|---------|------------|-------------------|--------------|----------------|------------|
| 1     | UNKNOWN | 3.16       | 0.75              | 9.3          | 0.8            | 0.753      |
| 2     | UNKNOWN | 3.29       | 0.05              | 0.5          | 0.1            | 0.047      |
| 3     | UNKNOWN | 3.89       | 2.19              | 17.7         | 2.4            | 2.194      |
| 4     | UNKNOWN | 5.41       | 48.52             | 277.9        | 53.1           | 48.521     |
| 5     | UNKNOWN | 6.23       | 48.48             | 248.1        | 53.1           | 48.485     |
| Total |         |            | 100.00            | 553.5        | 109.5          | 100.000    |

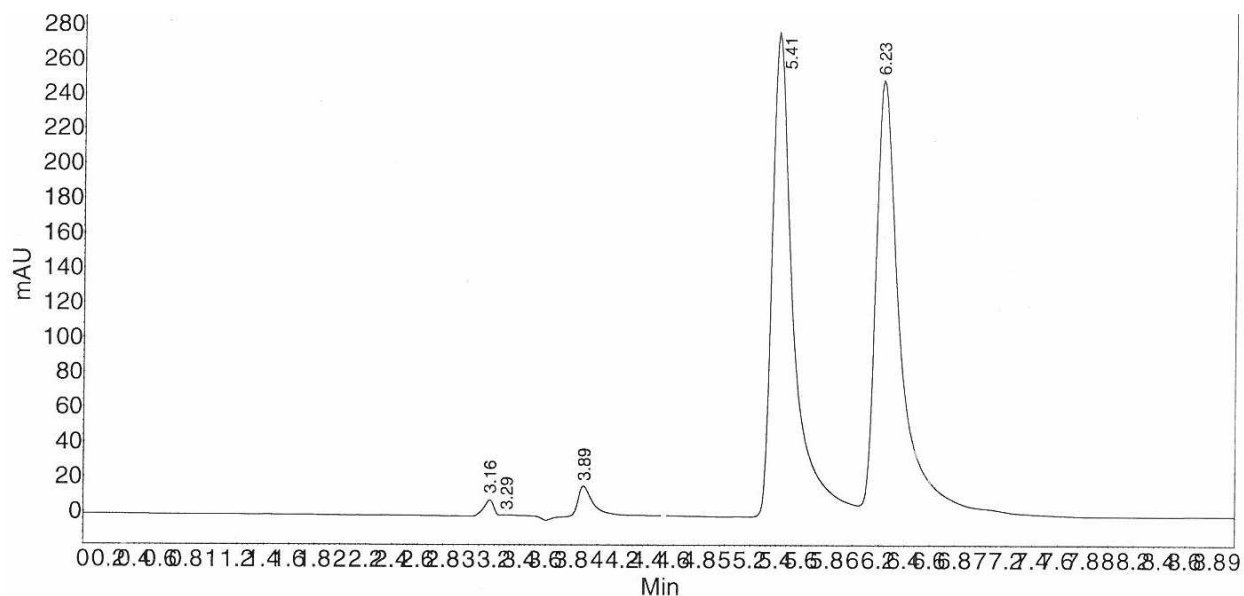

B: 38, (S)-(-) Enantiomer; Peak 1

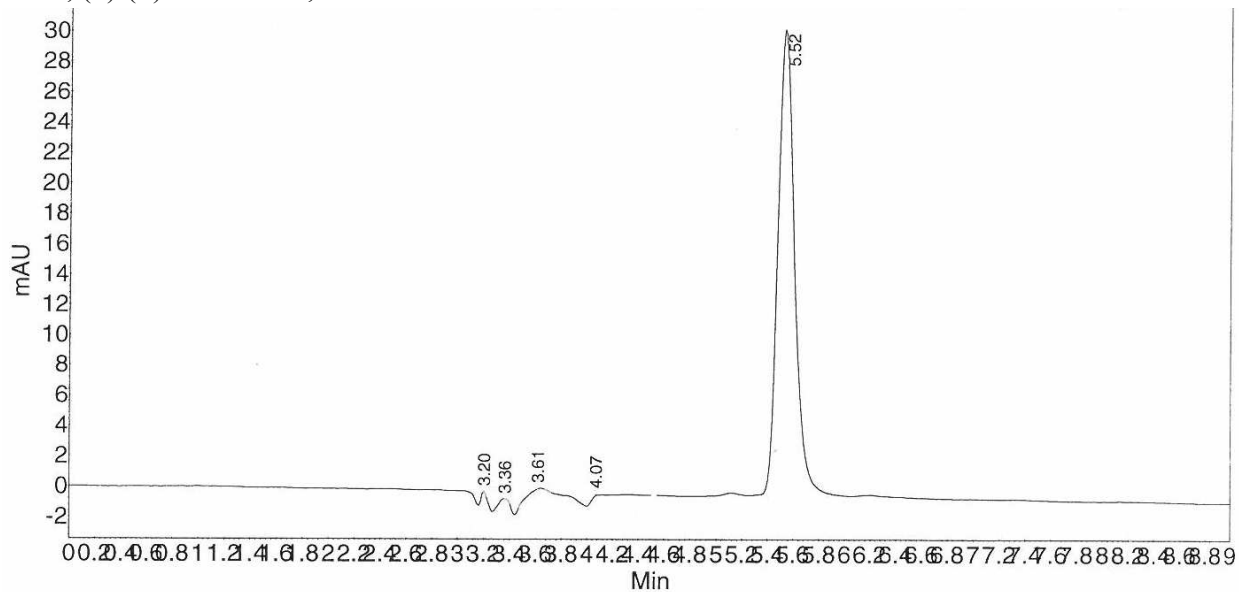

C: **39**; (R)-(+ Enantiomer; Peak 2

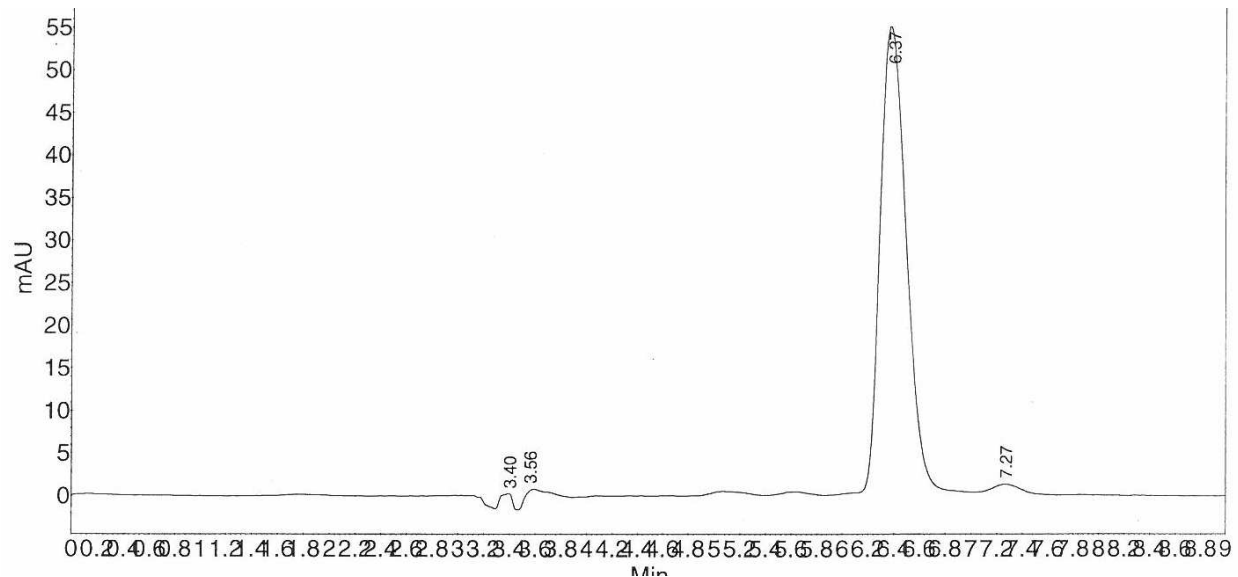

Figure 7: HPLC Chromatograms of **37** (A), **38** (S)-(-) Enantiomer; Peak 1 (B), and **39** (R)-(+ Enantiomer; Peak 2 (C) on chiral column (NP; Chiralpak IA, MTBE/ ethanol/DEA 2/8/0.1) recorded at 258 nm)

**Table S1** ESI MS data of NPS antagonists 1 to 30

| <b>Compound</b> | <b>Molecular Mass</b>        |                   |
|-----------------|------------------------------|-------------------|
|                 | <b>Found</b>                 | <b>Calculated</b> |
| <b>1</b>        | 468.17 [M+H] <sup>+a</sup>   | 468.48            |
| <b>2</b>        | 449.25 [M+H] <sup>+a</sup>   | 449.58            |
| <b>6</b>        | 450.18 [M+Na] <sup>+a</sup>  | 450.50            |
| <b>7</b>        | 429.2 [M+H] <sup>+b</sup>    | 429.50            |
| <b>8</b>        | 429.0 [M+H] <sup>+b</sup> ,  | 429.50            |
| <b>9</b>        | 429.3 [M+H] <sup>+b</sup> ;  | 429.50            |
| <b>10</b>       | 443.4 [M+H] <sup>+b</sup> ,  | 443.53            |
| <b>11</b>       | 443.5 [M+H] <sup>+b</sup> ,  | 443.53            |
| <b>12</b>       | 443.5 [M+H] <sup>+b</sup> ,  | 443.53            |
| <b>13</b>       | 565.3 [M+Na] <sup>+b</sup> . | 565.24            |
| <b>14</b>       | 443.5 [M+H] <sup>+b</sup>    | 443.21            |
| <b>15</b>       | 458.3 [M+H] <sup>+b</sup>    | 457.55            |
| <b>16</b>       | 388.16 [M+Na] <sup>+b</sup>  | 388.16            |



|           |                               |        |
|-----------|-------------------------------|--------|
| <b>17</b> | 402.18 [M+Na] <sup>+a</sup> . | 402.18 |
| <b>18</b> | 402.18 [M+Na] <sup>+a</sup> . | 402.18 |
| <b>19</b> | 416.19 [M+Na] <sup>+a</sup> . | 416.20 |
| <b>20</b> | 430.21 [M+Na] <sup>+a</sup>   | 430.21 |
| <b>21</b> | 444.22 [M+Na] <sup>+a</sup>   | 421.24 |
| <b>22</b> | 395.21 [M+H] <sup>+a</sup>    | 395.21 |
| <b>23</b> | 409.22 [M+H] <sup>+a</sup>    | 409.23 |
| <b>24</b> | 445.22 [M+Na] <sup>+a</sup>   | 445.22 |
| <b>25</b> | 434.0 [M+H] <sup>+b</sup>     | 434.56 |
| <b>26</b> | 435.2 [M+H] <sup>+b</sup>     | 435.55 |
| <b>27</b> | 507.1 [M+H] <sup>+b</sup>     | 507.61 |
| <b>28</b> | 407.6 [M+H] <sup>+b</sup>     | 407.50 |
| <b>29</b> | 507.2 [M+H] <sup>+b</sup>     | 507.61 |
| <b>30</b> | 407.4 [M+H] <sup>+b</sup>     | 407.50 |

Found values determined by a) ESI HRMS; b) ESI MS

# <sup>1</sup>H NMR spectra: SHA-68, 1

|                        |                      |                   |          |                        |                                                                     |
|------------------------|----------------------|-------------------|----------|------------------------|---------------------------------------------------------------------|
| Acquisition Time (sec) | 2.6542               | Comment           | 13646-25 | Date                   | 25 Mar 2013 10:58:08                                                |
| Date Stamp             | 25 Mar 2013 10:58:08 | Nucleus           | 1H       | File Name              | C:\Documents and Settings\chassier\My Documents\NMR\13646-25\10\fid |
| Frequency (MHz)        | 300.13               | Owner             | nmrUSER  | Number of Transients   | 128                                                                 |
| Original Points Count  | 16384                | SW(cyclical) (Hz) | 6172.84  | Points Count           | 16384                                                               |
| Receiver Gain          | 1149.40              | Spectrum Type     | STANDARD | Solvent                | CHLOROFORM-d                                                        |
| Spectrum Offset (Hz)   | 1841.7688            | Sweep Width (Hz)  | 6172.46  | Temperature (degree C) | 27.000                                                              |

<sup>1</sup>H NMR (300 MHz, CHLOROFORM-d)  $\delta$  ppm 2.17 (dd,  $J=13.19, 11.30$  Hz, 1 H), 2.83 - 3.00 (m, 1 H), 3.01 - 3.16 (m, 1 H), 3.63 (dd,  $J=13.00, 1.70$  Hz, 1 H), 3.86 (dd,  $J=13.00, 2.45$  Hz, 1 H), 4.03 (dd,  $J=13.19, 2.26$  Hz, 1 H), 4.26 - 4.49 (m, 3 H), 4.69 - 4.81 (m, 1 H), 6.95 - 7.09 (m, 1 H), 7.21 - 7.45 (m, 11 H), 7.47 - 7.56 (m, 2 H)

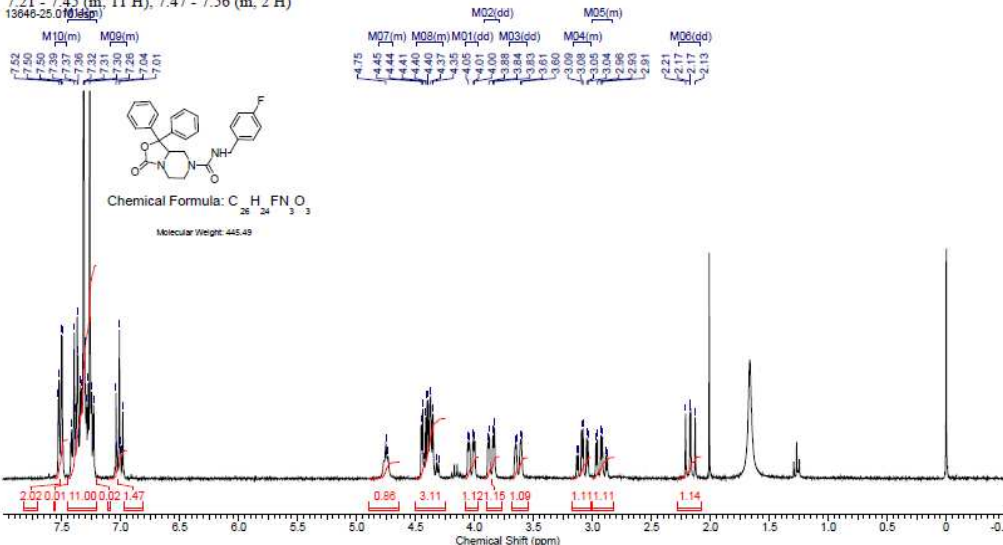

# RTI-118, 2

11/15/2012 2:17:03 PM  
13557-135 heated HV

|                        |                      |                   |                     |                        |                                                                                |
|------------------------|----------------------|-------------------|---------------------|------------------------|--------------------------------------------------------------------------------|
| Acquisition Time (sec) | 2.6542               | Comment           | 13557-135 heated HV | Date                   | 15 Nov 2012 13:12:16                                                           |
| Date Stamp             | 15 Nov 2012 13:12:16 | Nucleus           | 1H                  | File Name              | C:\Documents and Settings\chassier\My Documents\NMR\13557-135 heated HV\10\fid |
| Frequency (MHz)        | 300.13               | Owner             | nmrUSER             | Number of Transients   | 128                                                                            |
| Original Points Count  | 16384                | SW(cyclical) (Hz) | 6172.84             | Points Count           | 16384                                                                          |
| Receiver Gain          | 1448.20              | Spectrum Type     | STANDARD            | Solvent                | DMSO-d6                                                                        |
| Spectrum Offset (Hz)   | 1853.0359            | Sweep Width (Hz)  | 6172.46             | Temperature (degree C) | 27.000                                                                         |

13557-135 heated HV.010.esp

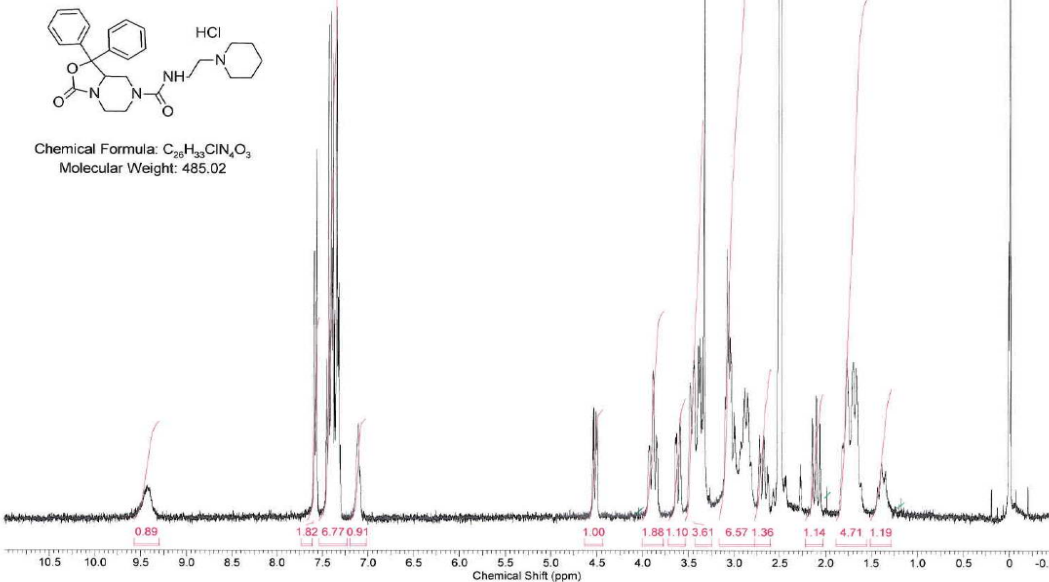

# Compound 6

11811-66-1

11811-66-1.121.esp

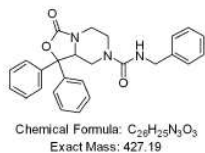

**RTI**  
INTERNATIONAL  
NMR Laboratory

Date Stamp: 21 Nov 2007 20:18:08  
Origin: spect  
Pulse Sequence: zg  
Solvent: CHLOROFORM-d  
Number of Transients: 16  
Sweep Width (Hz): 6172.46  
Acquisition Time (sec): 2.6542  
Receiver Gain: 322.50  
Temperature (degree C): 27.000  
Nucleus: 1H  
Frequency (MHz): 300.13  
Spectrum Offset (Hz): 1847.4115  
Original Points Count: 16384

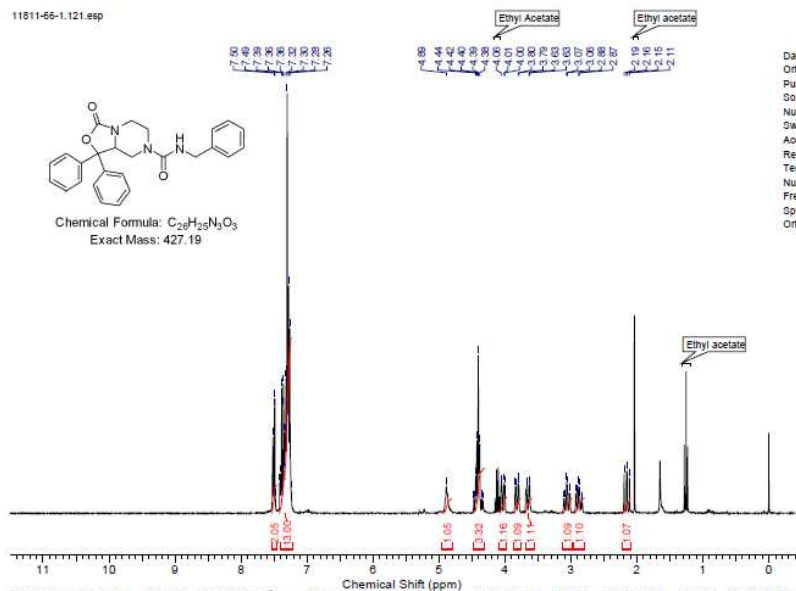

$^1\text{H}$  NMR (300 MHz, *CHLOROFORM-d*)  $\delta$  ppm 2.10 - 2.22 (1 H, m) 2.81 - 2.95 (1 H, m) 3.00 - 3.12 (1 H, m) 3.59 - 3.70 (1 H, m) 3.82 (1 H, dd,  $J=13.0, 3.2$  Hz) 4.03 (1 H, dt,  $J=13.3, 1.8$  Hz) 4.31 - 4.49 (3 H, m) 4.89 (1 H, br. s.) 7.24 - 7.42 (13 H, m) 7.47 - 7.54 (2 H, m)

# Compound 7

13646-29-1

13646-29-1re.010.esp

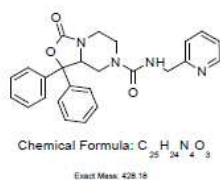

**RTI**  
INTERNATIONAL  
NMR Laboratory

Date Stamp: 11 Mar 2013 17:41:20  
Origin: spect  
Pulse Sequence: zg  
Solvent: CHLOROFORM-d  
Number of Transients: 128  
Sweep Width (Hz): 6172.46  
Acquisition Time (sec): 2.6542  
Receiver Gain: 1625.50  
Temperature (degree C): 27.000  
Nucleus: 1H  
Frequency (MHz): 300.13  
Spectrum Offset (Hz): 1841.5800  
Original Points Count: 16384

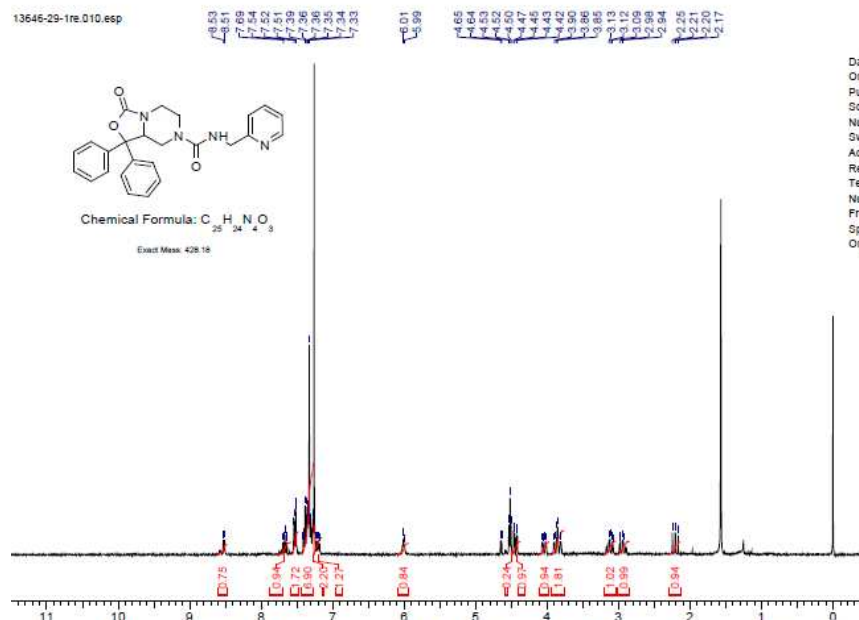

$^1\text{H}$  NMR (300 MHz, *CHLOROFORM-d*)  $\delta$  ppm 2.21 (1 H, dt,  $J=13.3, 1.3$  Hz) 2.96 (1 H, dd,  $J=13.6, 3.8$  Hz) 3.10 (1 H, dd,  $J=13.2, 3.8$  Hz) 3.78 - 3.93 (2 H, m) 4.04 (1 H, dd,  $J=13.4, 2.4$  Hz) 4.44 (1 H, dd,  $J=11.3, 3.8$  Hz) 4.48 - 4.68 (2 H, m) 5.95 - 6.09 (1 H, m) 7.21 (1 H, dd,  $J=7.2, 5.3$  Hz) 7.27 - 7.44 (9 H, m) 7.49 - 7.60 (2 H, m) 7.67 (1 H, td,  $J=7.6, 1.7$  Hz) 8.52 (1 H, d,  $J=4.9$  Hz)

## Compound 8

12646-28-1

13646-28-1.010.esp

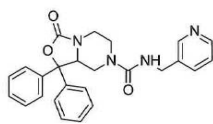

Exact Mass: 428.18

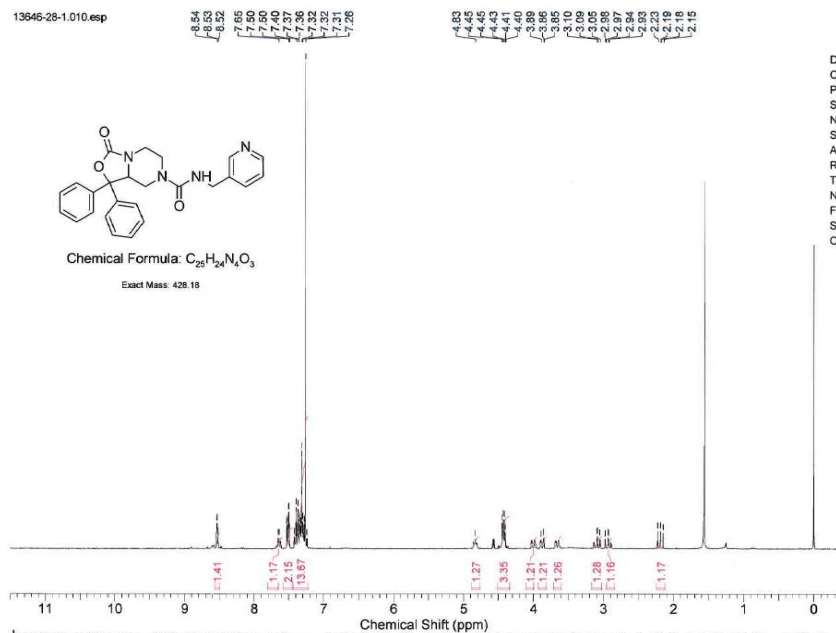

$^1\text{H}$  NMR (300 MHz, *CHLOROFORM-d*)  $\delta$  ppm 2.19 (1 H, dd,  $J=13.6, 11.3$  Hz) 2.95 (1 H, dd,  $J=13.0, 3.2$  Hz) 3.03 - 3.15 (1 H, m) 3.61 - 3.70 (1 H, m) 3.82 - 3.93 (1 H, m) 3.95 - 4.05 (1 H, m) 4.34 - 4.51 (2 H, m) 4.83 (1 H, br. s.) 7.22 - 7.43 (10 H, m) 7.48 - 7.55 (2 H, m) 7.64 (1 H, d,  $J=7.2$  Hz) 8.51 - 8.57 (1 H, m)

**RTI**  
INTERNATIONAL  
NMR Laboratory

Date Stamp 11 Mar 2013 15:24:4E  
Origin spect  
Pulse Sequence zg  
Solvent *CHLOROFORM-d*  
Number of Transients 128  
Sweep Width (Hz) 6172.46  
Acquisition Time (sec) 2.6542  
Receiver Gain 1625.50  
Temperature (degree C) 27.000  
Nucleus  $^1\text{H}$   
Frequency (MHz) 300.13  
Spectrum Offset (Hz) 1841.5770  
Original Points Count 16384

## Compound 9

13646-27-2

13646-27-2.010.esp

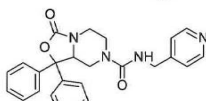

Exact Mass: 428.18

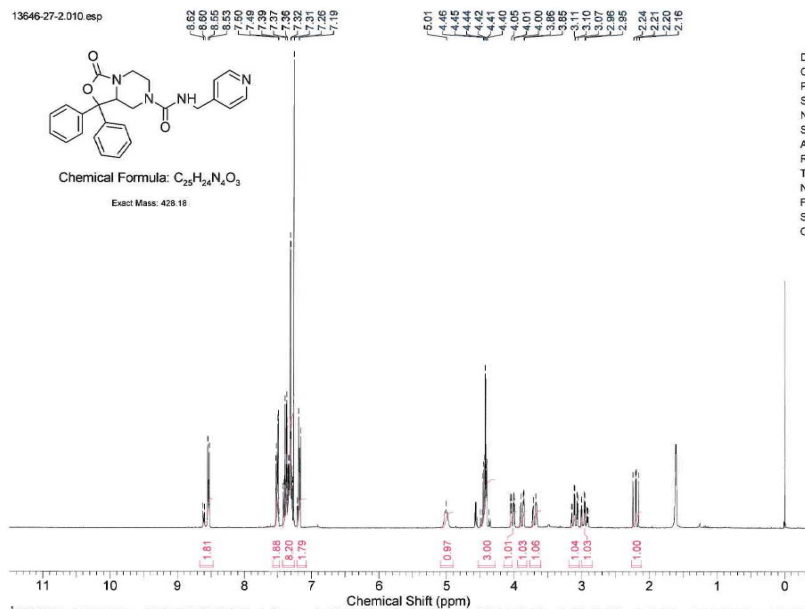

$^1\text{H}$  NMR (300 MHz, *CHLOROFORM-d*)  $\delta$  ppm 2.20 (1 H, dd,  $J=13.6, 11.3$  Hz) 2.89 - 3.02 (1 H, m) 3.03 - 3.18 (1 H, m) 3.62 - 3.75 (1 H, m) 3.82 - 3.94 (1 H, m) 4.02 (1 H, ddd,  $J=13.4, 3.6, 1.5$  Hz) 4.31 - 4.51 (3 H, m) 5.01 (1 H, br. s.) 7.13 - 7.23 (2 H, m) 7.24 - 7.44 (8 H, m) 7.47 - 7.58 (2 H, m) 8.49 - 8.64 (2 H, m) 8.50 - 8.51 (1 H, m)

**RTI**  
INTERNATIONAL  
NMR Laboratory

Date Stamp 11 Mar 2013 14:52:4E  
Origin spect  
Pulse Sequence zg  
Solvent *CHLOROFORM-d*  
Number of Transients 128  
Sweep Width (Hz) 6172.46  
Acquisition Time (sec) 2.6542  
Receiver Gain 812.70  
Temperature (degree C) 27.000  
Nucleus  $^1\text{H}$   
Frequency (MHz) 300.13  
Spectrum Offset (Hz) 1841.8622  
Original Points Count 16384

## Compound 10

13646-10-2

13646-10-2.010.esp

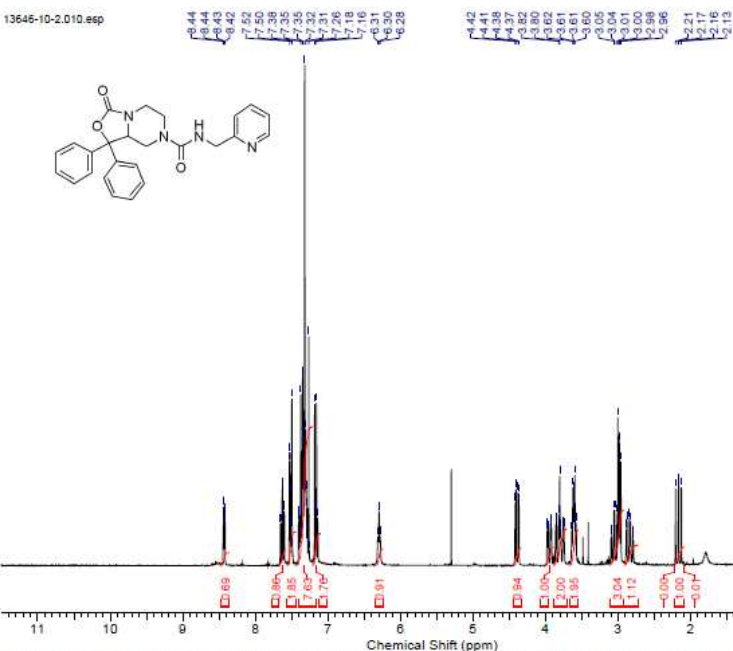

<sup>1</sup>H NMR (300 MHz, CHLOROFORM-d) δ ppm 2.17 (1 H, dd, *J*=13.2, 11.3 Hz) 2.84 (1 H, td, *J*=12.8, 3.4 Hz) 2.93 - 3.11 (3 H, m) 3.55 - 3.66 (2 H, m) 3.72 - 3.87 (2 H, m) 3.89 - 4.00 (1 H, m) 4.39 (1 H, dd, *J*=11.1, 3.6 Hz) 6.30 (1 H, t, *J*=4.9 Hz) 7.12 - 7.21 (2 H, m) 7.23 - 7.42 (8 H, m) 7.46 - 7.55 (2 H, m) 7.63 (1 H, td, *J*=7.7, 1.9 Hz) 8.43 (1 H, dt, *J*=4.6, 1.5 Hz)

**IRTI**  
INTERNATIONAL  
NMR Laboratory

Date Stamp 18 Feb 2013 16:20:00  
Origin spect  
Pulse Sequence zg  
Solvent CHLOROFORM-d  
Number of Transients 128  
Sweep Width (Hz) 6172.46  
Acquisition Time (sec) 2.6542  
Receiver Gain 256.00  
Temperature (degree C) 27.000  
Nucleus 1H  
Frequency (MHz) 300.13  
Spectrum Offset (Hz) 1842.5944  
Original Points Count 16384

## Compound 11

13646-11-2

13646-11-2.011.esp

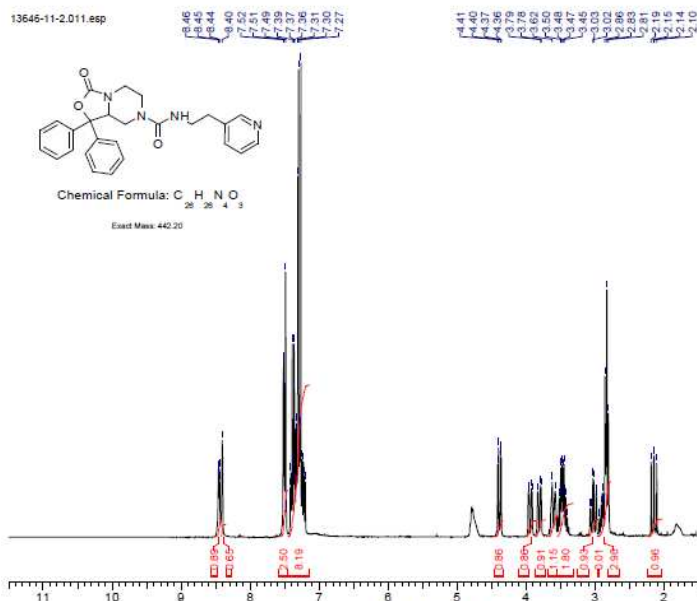

<sup>1</sup>H NMR (300 MHz, CHLOROFORM-d) δ ppm 2.14 (1 H, dd, *J*=13.2, 11.3 Hz) 2.78 - 2.95 (3 H, m) 3.02 (1 H, td, *J*=12.7, 3.6 Hz) 3.34 - 3.53 (2 H, m) 3.60 (1 H, d, *J*=12.8 Hz) 3.81 (1 H, dd, *J*=12.8, 2.6 Hz) 3.94 (1 H, dd, *J*=13.2, 3.4 Hz) 4.39 (1 H, dd, *J*=11.3, 3.8 Hz) 7.17 - 7.44 (9 H, m) 7.46 - 7.56 (3 H, m) 8.35 - 8.50 (2 H, m)

**IRTI**  
INTERNATIONAL  
NMR Laboratory

Date Stamp 18 Feb 2013 16:54:08  
Origin spect  
Pulse Sequence zg  
Solvent CHLOROFORM-d  
Number of Transients 128  
Sweep Width (Hz) 6172.46  
Acquisition Time (sec) 2.6542  
Receiver Gain 256.00  
Temperature (degree C) 27.000  
Nucleus 1H  
Frequency (MHz) 300.13  
Spectrum Offset (Hz) 1843.2217  
Original Points Count 16384

# Compound 12

13646-13-2

13646-13-2.020.esp

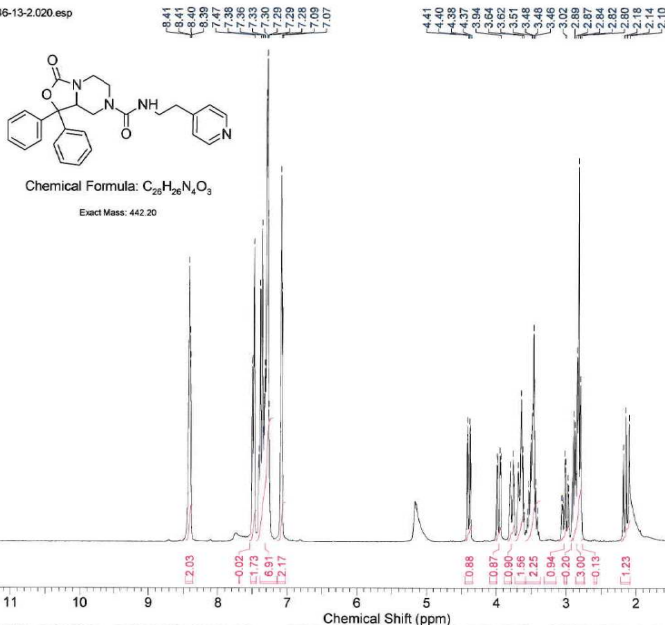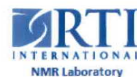

Date Stamp 19 Feb 2013 14:05:36  
 Origin spect  
 Pulse Sequence zg  
 Solvent CHLOROFORM-d  
 Number of Transients 64  
 Sweep Width (Hz) 6172.46  
 Acquisition Time (sec) 2.6542  
 Receiver Gain 161.30  
 Temperature (degree C) 27.000  
 Nucleus 1H  
 Frequency (MHz) 300.13  
 Spectrum Offset (Hz) 1845.7279  
 Original Points Count 16384

<sup>1</sup>H NMR (300 MHz, CHLOROFORM-d) δ ppm 2.08 - 2.22 (1 H, m) 2.78 - 2.91 (3 H, m) 3.01 (1 H, td, J=12.7, 3.2 Hz) 3.37 - 3.58 (2 H, m) 3.58 - 3.73 (2 H, m) 3.78 (1 H, d, J=13.2 Hz) 3.96 (1 H, dd, J=13.4, 2.8 Hz) 4.39 (1 H, dd, J=11.1, 3.6 Hz) 7.02 - 7.15 (2 H, m) 7.19 - 7.44 (7 H, m) 7.44 - 7.53 (2 H, m) 8.36 - 8.46 (2 H, m)

# Compound 13

|                        |                                                                                                                                       |                   |                                    |                        |                      |
|------------------------|---------------------------------------------------------------------------------------------------------------------------------------|-------------------|------------------------------------|------------------------|----------------------|
| Acquisition Time (sec) | 2.6542                                                                                                                                | Comment           | 5 mm QNP 1H/13C/31P/19F Z3246/0232 | Date                   | 30 Jul 2009 10:17:36 |
| Date Stamp             | 30 Jul 2009 10:17:36                                                                                                                  |                   |                                    |                        |                      |
| File Name              | C:\Documents and Settings\chassler\My Documents\NMR\SPR NMR data raw files\SPR archive data 2005to2010 nmr\nmr\Jul30-2009-srun\20\fid |                   |                                    |                        |                      |
| Frequency (MHz)        | 300.13                                                                                                                                | Nucleus           | 1H                                 | Number of Transients   | 16                   |
| Original Points Count  | 16384                                                                                                                                 | Owner             | nmr\USER                           | Points Count           | 16384                |
| Receiver Gain          | 256.00                                                                                                                                | SW(cyclical) (Hz) | 6172.84                            | Solvent                | CHLOROFORM-d         |
| Spectrum Type          | STANDARD                                                                                                                              | Sweep Width (Hz)  | 6172.46                            | Temperature (degree C) | 27.000               |
|                        |                                                                                                                                       |                   |                                    | Spectrum Offset (Hz)   | 1847.9398            |

<sup>1</sup>H NMR (300 MHz, CHLOROFORM-d) δ ppm 1.50 (s, 9 H), 2.14 (dd, J=13.37, 11.11 Hz, 1 H), 2.73 - 2.89 (m, 1 H), 2.93 - 3.09 (m, 1 H), 3.66 - 3.85 (m, 2 H), 3.91 - 4.02 (m, 1 H), 4.29 (d, J=5.65 Hz, 1 H), 4.34 - 4.48 (m, 2 H), 5.44 (s, 1 H), 7.04 (dd, J=7.54, 1.13 Hz, 1 H), 7.21 - 7.42 (m, 10 H), 7.44 - 7.54 (m, 2 H), 7.70 (d, J=7.91 Hz, 1 H), 8.15 (s, 1 H)

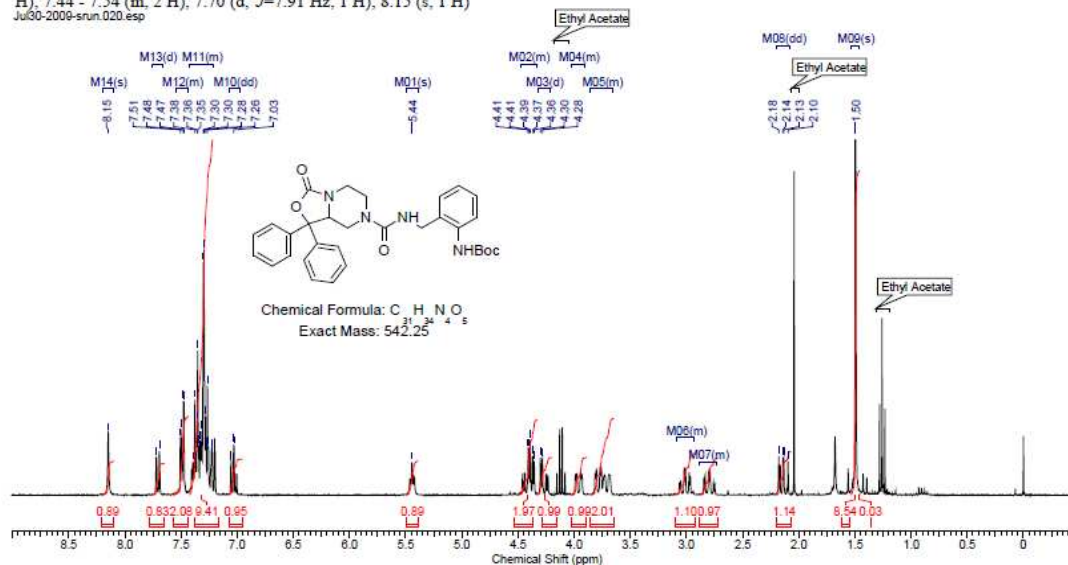



## Compound 14

|                        |                                                                                                                                   |                   |                                    |                        |              |                      |           |
|------------------------|-----------------------------------------------------------------------------------------------------------------------------------|-------------------|------------------------------------|------------------------|--------------|----------------------|-----------|
| Acquisition Time (sec) | 2.6542                                                                                                                            | Comment           | 5 mm QNP 1H/13C/31P/19F Z3246/0232 |                        | Date         | 30 Jul 2009 14:50:40 |           |
| Date Stamp             | 30 Jul 2009 14:50:40                                                                                                              |                   |                                    |                        |              |                      |           |
| File Name              | C:\Documents and Settings\chassler\My Documents\NMR\SPR NMR data raw files\SPR archive data 2005to2010 nmr\Jul30-2009-srun\50\fid |                   |                                    |                        |              |                      |           |
| Frequency (MHz)        | 300.13                                                                                                                            | Nucleus           | 1H                                 | Number of Transients   | 18           | Origin               | spect     |
| Original Points Count  | 16384                                                                                                                             | Owner             | nmrUSER                            | Points Count           | 16384        | Pulse Sequence       | zg        |
| Receiver Gain          | 143.70                                                                                                                            | SW(cyclical) (Hz) | 6172.84                            | Solvent                | CHLOROFORM-d | Spectrum Offset (Hz) | 1847.0571 |
| Spectrum Type          | STANDARD                                                                                                                          | Sweep Width (Hz)  | 6172.46                            | Temperature (degree C) | 27.000       |                      |           |

<sup>1</sup>H NMR (300 MHz, CHLOROFORM-d)  $\delta$  ppm 2.07 - 2.21 (m, 1 H), 2.79 (td,  $J=12.81, 3.77$  Hz, 1 H), 2.92 - 3.13 (m, 1 H), 3.61 - 3.81 (m, 3 H), 3.93 (dd,  $J=13.19, 3.01$  Hz, 3 H), 4.25 - 4.50 (m, 4 H), 5.06 (br. s., 1 H), 6.61 - 6.72 (m, 2 H), 6.99 - 7.14 (m, 2 H), 7.23 - 7.40 (m, 8 H), 7.44 - 7.52 (m, 2 H)

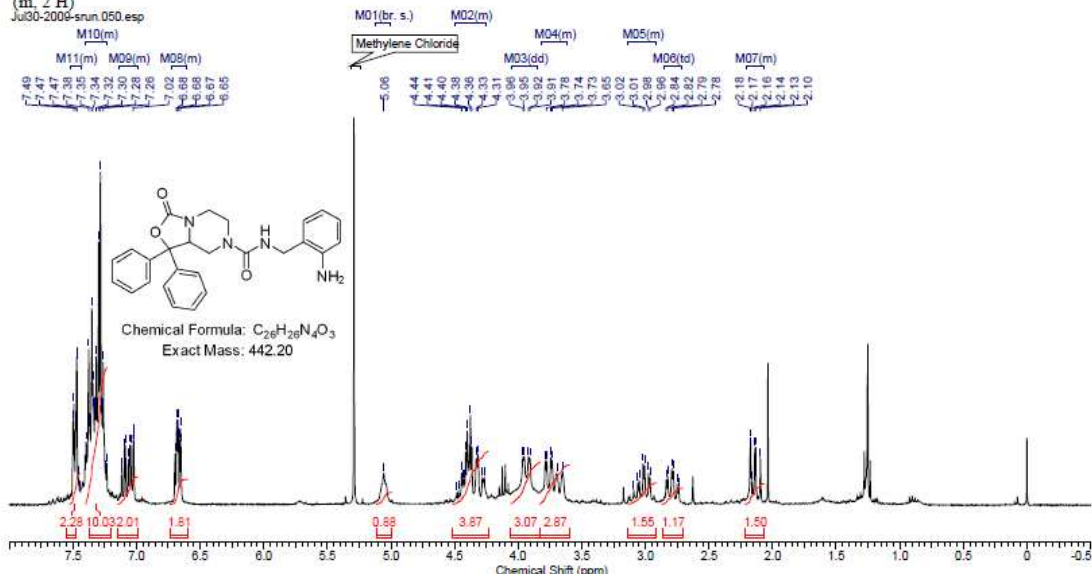

## Compound 15

|                        |                      |                   |            |                      |                                                                             |                        |        |
|------------------------|----------------------|-------------------|------------|----------------------|-----------------------------------------------------------------------------|------------------------|--------|
| Acquisition Time (sec) | 2.6542               | Comment           | R06039-284 | Date                 | 02 May 2013 14:31:28                                                        |                        |        |
| Date Stamp             | 02 May 2013 14:31:28 |                   |            | File Name            | C:\Documents and Settings\chassler\My Documents\NMR\R06039-284 CDCI3\10\fid |                        |        |
| Frequency (MHz)        | 300.13               | Nucleus           | 1H         | Number of Transients | 128                                                                         | Origin                 | spect  |
| Original Points Count  | 16384                | Owner             | nmrUSER    | Points Count         | 16384                                                                       | Pulse Sequence         | zg     |
| Receiver Gain          | 1024.00              | SW(cyclical) (Hz) | 6172.84    | Solvent              | CHLOROFORM-d                                                                |                        |        |
| Spectrum Offset (Hz)   | 1841.9103            | Spectrum Type     | STANDARD   | Sweep Width (Hz)     | 6172.46                                                                     | Temperature (degree C) | 27.000 |

<sup>1</sup>H NMR (300 MHz, CHLOROFORM-d)  $\delta$  ppm 2.24 (dd,  $J=13.56, 11.30$  Hz, 1 H), 2.88 (s, 3 H), 2.91 - 3.05 (m, 1 H), 3.05 - 3.23 (m, 1 H), 3.67 (d,  $J=12.43$  Hz, 2 H), 3.85 (dd,  $J=13.00, 2.83$  Hz, 1 H), 4.23 - 4.32 (m, 1 H), 4.38 - 4.46 (m, 1 H), 4.47 - 4.61 (m, 3 H), 6.71 - 6.86 (m, 2 H), 6.96 (d,  $J=6.40$  Hz, 1 H), 7.11 - 7.21 (m, 1 H), 7.27 - 7.42 (m, 8 H), 7.47 - 7.56 (m, 2 H)

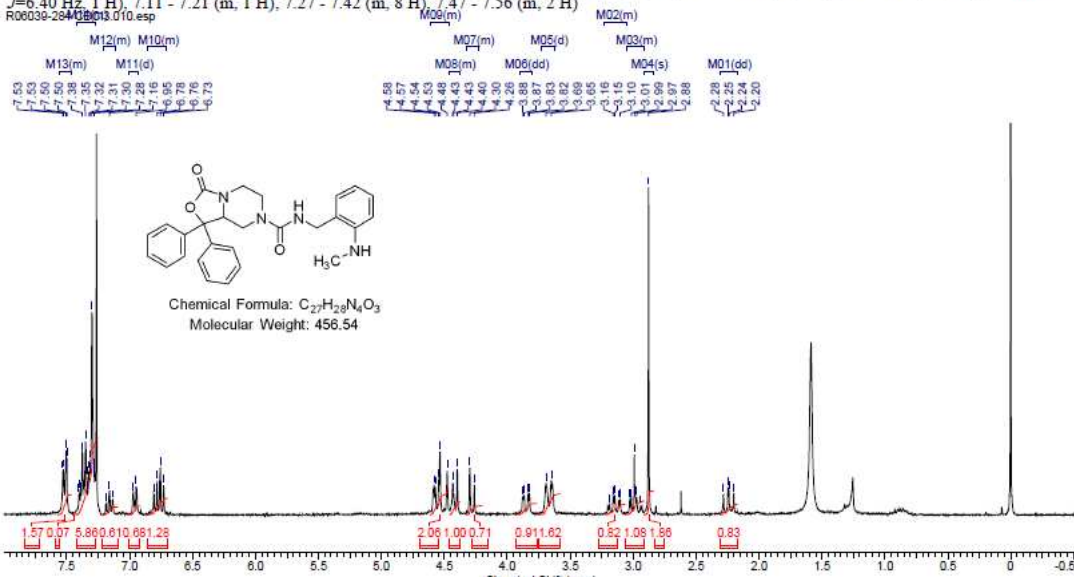

# Compound 16

Dec13-07-run.030.esp

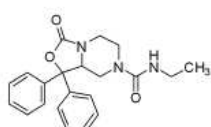

Chemical Formula:  $C_{21}H_{23}N_3O_3$   
Exact Mass: 365.17

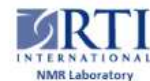

Date Stamp 13 Dec 2007 19:46:16  
Origin spect  
Pulse Sequence zg  
Solvent CHLOROFORM-d  
Number of Transients 16  
Sweep Width (Hz) 6172.46  
Acquisition Time (sec) 2.6542  
Receiver Gain 228.10  
Temperature (degree C) 27.000  
Nucleus 1H  
Frequency (MHz) 300.13  
Spectrum Offset (Hz) 1849.1913  
Original Points Count 16384

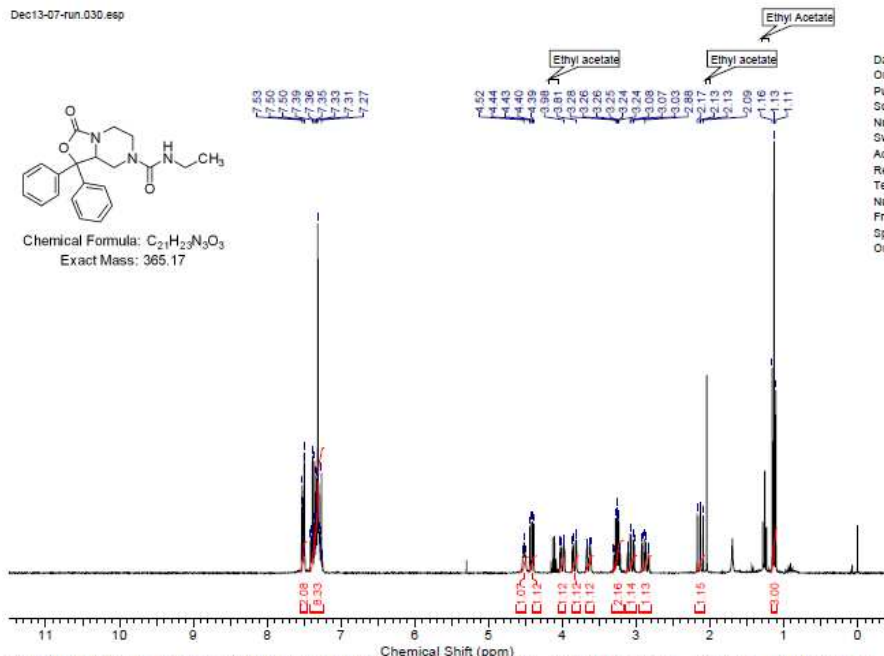

$^1H$  NMR (300 MHz,  $CHLOROFORM-d$ )  $\delta$  ppm 1.13 (3 H, t,  $J=7.2$  Hz) 2.07 - 2.20 (1 H, m) 2.81 - 2.96 (1 H, m) 3.07 (1 H, td,  $J=12.7, 3.6$  Hz) 3.19 - 3.35 (2 H, m) 3.58 - 3.69 (1 H, m) 3.84 (1 H, dd,  $J=13.0, 2.4$  Hz) 4.00 (1 H, ddd,  $J=13.3, 3.5, 1.3$  Hz) 4.42 (1 H, dd,  $J=11.3, 3.4$  Hz) 4.50 - 4.58 (1 H, m) 7.25 - 7.42 (8 H, m) 7.47 - 7.54 (2 H, m)

# Compound 17

4/30/2013 5:01:06 PM  
R06039-161

|                        |                      |                   |                                                                        |                        |                      |
|------------------------|----------------------|-------------------|------------------------------------------------------------------------|------------------------|----------------------|
| Acquisition Time (sec) | 2.6542               | Comment           | R06039-161                                                             | Date                   | 30 Apr 2013 16:03:12 |
| Date Stamp             | 30 Apr 2013 16:03:12 | File Name         | C:\Documents and Settings\jchasser\My Documents\NMR\R06039-161\110\fid |                        |                      |
| Frequency (MHz)        | 300.13               | Nucleus           | 1H                                                                     | Number of Transients   | 128                  |
| Original Points Count  | 16384                | Owner             | nmrUSER                                                                | Points Count           | 16384                |
| Receiver Gain          | 203.20               | SW(cyclical) (Hz) | 6172.94                                                                | Solvent                | CHLOROFORM-d         |
| Spectrum Offset (Hz)   | 1843.7799            | Spectrum Type     | STANDARD                                                               | Sweep Width (Hz)       | 6172.46              |
|                        |                      |                   |                                                                        | Temperature (degree C) | 27.000               |

$^1H$  NMR (300 MHz,  $CHLOROFORM-d$ )  $\delta$  ppm 1.10 - 1.21 (m, 6 H), 2.02 - 2.18 (m, 1 H), 2.79 - 2.95 (m, 1 H), 3.07 (td,  $J=12.62, 3.39$  Hz, 1 H), 3.59 (dt,  $J=13.19, 1.70$  Hz, 1 H), 3.78 - 4.11 (m, 3 H), 4.33 (d,  $J=7.16$  Hz, 1 H), 4.42 (dd,  $J=11.30, 3.77$  Hz, 1 H), 7.25 - 7.44 (m, 8 H), 7.46 - 7.56 (m, 2 H)

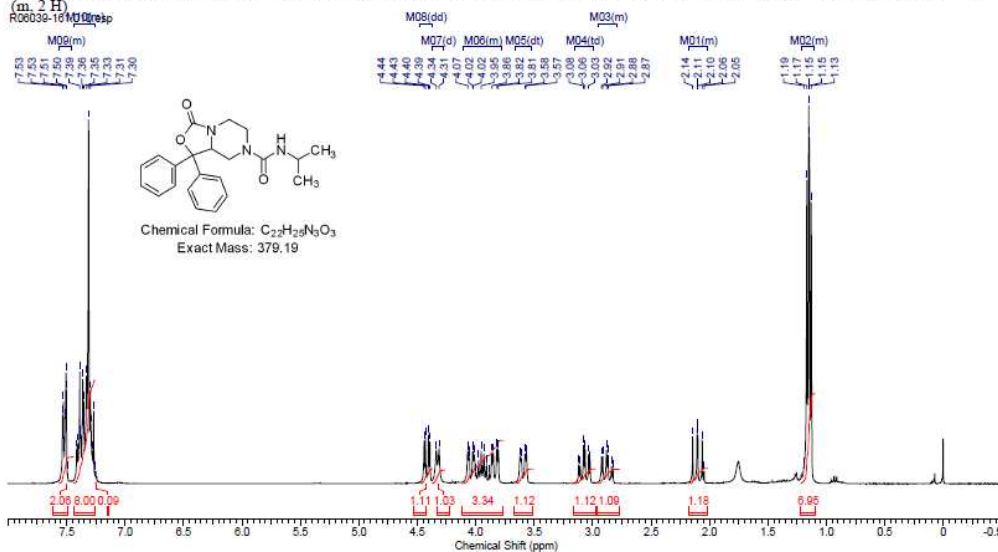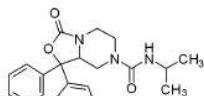

Chemical Formula:  $C_{22}H_{25}N_3O_3$   
Exact Mass: 379.19



## Compound 18

|                        |                                                                                                                                |                   |                      |                        |                      |
|------------------------|--------------------------------------------------------------------------------------------------------------------------------|-------------------|----------------------|------------------------|----------------------|
| Acquisition Time (sec) | 2.6542                                                                                                                         | Date              | 13 Dec 2007 16:08:32 | Date Stamp             | 13 Dec 2007 16:08:32 |
| File Name              | C:\Documents and Settings\chassier\My Documents\NMR\SPR NMR data raw files\SPR Archive data nmr\2005to2008\Dec13-07-run\10\fid |                   |                      |                        |                      |
| Frequency (MHz)        | 300.13                                                                                                                         | Nucleus           | <sup>1</sup> H       | Number of Transients   | 16                   |
| Original Points Count  | 16384                                                                                                                          | Owner             | nmr\USER             | Points Count           | 16384                |
| Receiver Gain          | 256.00                                                                                                                         | SW(cyclical) (Hz) | 6172.84              | Solvent                | CHLOROFORM-d         |
| Spectrum Type          | STANDARD                                                                                                                       | Sweep Width (Hz)  | 6172.46              | Temperature (degree C) | 27.000               |
|                        |                                                                                                                                |                   |                      | Pulse Sequence         | zg                   |
|                        |                                                                                                                                |                   |                      | Spectrum Offset (Hz)   | 1848.9683            |

<sup>1</sup>H NMR (300 MHz, CHLOROFORM-d)  $\delta$  ppm 0.91 (t,  $J=7.54$  Hz, 3 H), 1.46 - 1.59 (m, 2 H), 2.07 - 2.20 (m, 1 H), 2.83 - 2.95 (m, 1 H), 3.07 (td,  $J=12.62, 3.39$  Hz, 1 H), 3.18 (tdd,  $J=7.25, 7.25, 5.46, 1.88$  Hz, 2 H), 3.63 (dt,  $J=13.19, 1.88$  Hz, 1 H), 3.84 (dd,  $J=12.81, 2.64$  Hz, 1 H), 4.01 (ddd,  $J=13.28, 3.67, 1.51$  Hz, 1 H), 4.42 (dd,  $J=11.30, 3.39$  Hz, 1 H), 4.55 (t,  $J=5.46$  Hz, 1 H), 7.23 - 7.44 (m, 8 H), 7.47 - 7.56 (m, 2 H)

Dec13-07-run.010.esp

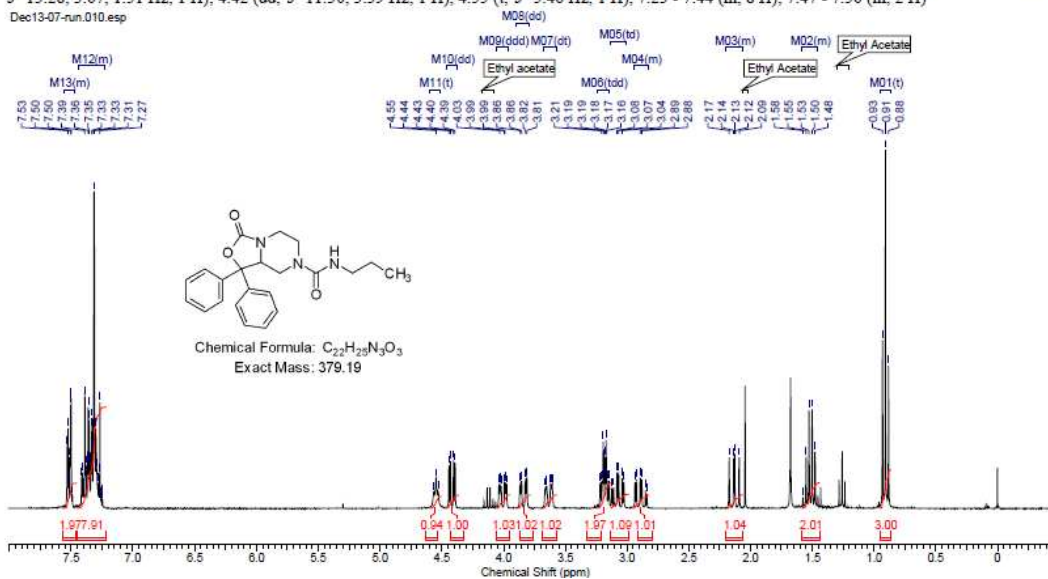

## Compound 19

|                        |                                                                                                                                |                   |                      |                        |                      |
|------------------------|--------------------------------------------------------------------------------------------------------------------------------|-------------------|----------------------|------------------------|----------------------|
| Acquisition Time (sec) | 2.6542                                                                                                                         | Date              | 14 Dec 2007 17:44:32 | Date Stamp             | 14 Dec 2007 17:44:32 |
| File Name              | C:\Documents and Settings\chassier\My Documents\NMR\SPR NMR data raw files\SPR Archive data nmr\2005to2008\Dec14-07-run\10\fid |                   |                      |                        |                      |
| Frequency (MHz)        | 300.13                                                                                                                         | Nucleus           | <sup>1</sup> H       | Number of Transients   | 16                   |
| Original Points Count  | 16384                                                                                                                          | Owner             | nmr\USER             | Points Count           | 16384                |
| Receiver Gain          | 128.00                                                                                                                         | SW(cyclical) (Hz) | 6172.84              | Solvent                | CHLOROFORM-d         |
| Spectrum Type          | STANDARD                                                                                                                       | Sweep Width (Hz)  | 6172.46              | Temperature (degree C) | 27.000               |
|                        |                                                                                                                                |                   |                      | Pulse Sequence         | zg                   |
|                        |                                                                                                                                |                   |                      | Spectrum Offset (Hz)   | 1850.2657            |

<sup>1</sup>H NMR (300 MHz, CHLOROFORM-d)  $\delta$  ppm 0.87 - 0.97 (m, 3 H), 1.30 - 1.40 (m, 2 H), 1.41 - 1.54 (m, 2 H), 2.07 - 2.19 (m, 1 H), 2.81 - 2.94 (m, 1 H), 3.07 (td,  $J=12.62, 3.39$  Hz, 1 H), 3.16 - 3.27 (m, 2 H), 3.59 - 3.69 (m, 1 H), 3.83 (dd,  $J=13.00, 2.83$  Hz, 1 H), 3.95 - 4.05 (m, 1 H), 4.41 (dd,  $J=11.11, 3.58$  Hz, 1 H), 4.61 (t,  $J=5.27$  Hz, 1 H), 7.23 - 7.44 (m, 8 H), 7.47 - 7.57 (m, 2 H)

Dec14-07-run.010.esp

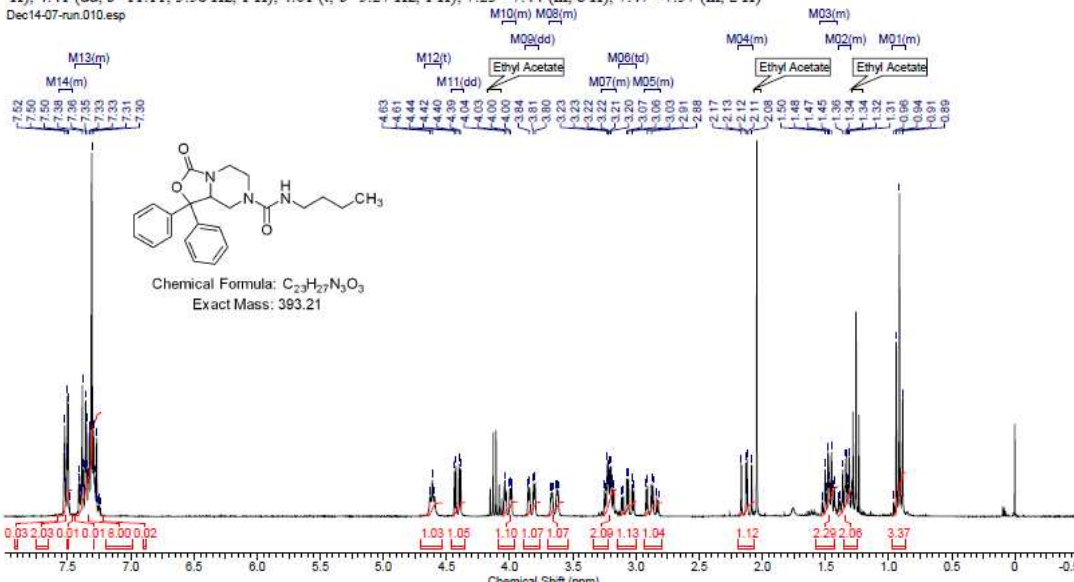

## Compound 20

|                        |                      |                   |                                                                      |                        |                      |
|------------------------|----------------------|-------------------|----------------------------------------------------------------------|------------------------|----------------------|
| Acquisition Time (sec) | 2.6542               | Comment           | R06039-180                                                           | Date                   | 30 Apr 2013 17:07:12 |
| Date Stamp             | 30 Apr 2013 17:07:12 | File Name         | C:\Documents and Settings\chasserl\My Documents\NMR\R06039-180\10fid |                        |                      |
| Frequency (MHz)        | 300.13               | Nucleus           | 1H                                                                   | Number of Transients   | 128                  |
| Original Points Count  | 16384                | Owner             | nmrUSER                                                              | Points Count           | 16384                |
| Receiver Gain          | 181.00               | SW(cyclical) (Hz) | 6172.84                                                              | Solvent                | CHLOROFORM-d         |
| Spectrum Offset (Hz)   | 1843.2789            | Spectrum Type     | STANDARD                                                             | Sweep Width (Hz)       | 6172.46              |
|                        |                      |                   |                                                                      | Temperature (degree C) | 27.000               |

<sup>1</sup>H NMR (300 MHz, CHLOROFORM-d)  $\delta$  ppm 0.81 - 0.98 (m, 3 H), 1.18 - 1.41 (m, 4 H), 1.49 (quin,  $J=7.25$  Hz, 2 H), 2.13 (dd,  $J=13.19, 11.30$  Hz, 1 H), 2.79 - 2.97 (m, 1 H), 3.07 (td,  $J=12.62, 3.77$  Hz, 1 H), 3.14 - 3.31 (m, 2 H), 3.56 - 3.72 (m, 1 H), 3.83 (dd,  $J=13.19, 2.64$  Hz, 1 H), 4.01 (ddd,  $J=13.37, 3.58, 1.13$  Hz, 1 H), 4.41 (dd,  $J=11.30, 3.77$  Hz, 1 H), 4.57 (t,  $J=5.46$  Hz, 1 H), 7.16 - 7.46 (m, 8 H), 7.47 - 7.61 (m, 2 H)

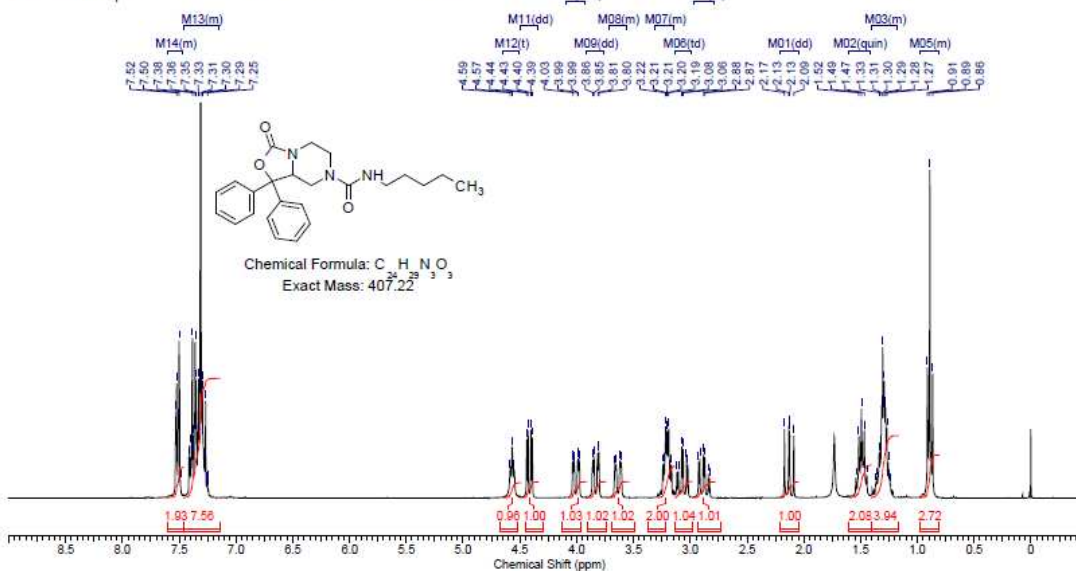

## Compound 21

|                        |                      |                   |                                                              |                        |                      |
|------------------------|----------------------|-------------------|--------------------------------------------------------------|------------------------|----------------------|
| Acquisition Time (sec) | 2.6542               | Comment           | 11811-17                                                     | Date                   | 05 Sep 2007 19:50:24 |
| Date Stamp             | 05 Sep 2007 19:50:24 | File Name         | E:\Experimentals\Yzhang archive data 2008\nmr\11811-17\40\fd |                        |                      |
| Frequency (MHz)        | 300.13               | Nucleus           | 1H                                                           | Number of Transients   | 16                   |
| Original Points Count  | 16384                | Owner             | nmrUSER                                                      | Points Count           | 16384                |
| Receiver Gain          | 161.30               | SW(cyclical) (Hz) | 6172.84                                                      | Solvent                | CHLOROFORM-d         |
| Spectrum Offset (Hz)   | 1849.5393            | Spectrum Type     | STANDARD                                                     | Sweep Width (Hz)       | 6172.46              |
|                        |                      |                   |                                                              | Temperature (degree C) | 27.000               |

<sup>1</sup>H NMR (300 MHz, CHLOROFORM-d)  $\delta$  ppm 0.84 - 0.92 (m, 3 H), 1.25 - 1.33 (m, 6 H), 1.43 - 1.53 (m, 2 H), 2.06 - 2.15 (m, 1 H), 2.89 (dd,  $J=13.00, 3.58$  Hz, 1 H), 3.05 (dd,  $J=12.62, 3.58$  Hz, 1 H), 3.16 - 3.24 (m, 2 H), 3.60 - 3.69 (m, 1 H), 3.60 - 3.68 (m, 1 H), 3.83 (dd,  $J=13.00, 2.83$  Hz, 1 H), 4.01 (ddd,  $J=13.38, 3.58, 1.13$  Hz, 1 H), 4.41 (dd,  $J=11.30, 3.77$  Hz, 1 H), 4.59 (s, 1 H), 7.26 - 7.42 (m, 8 H), 7.47 - 7.55 (m, 2 H)

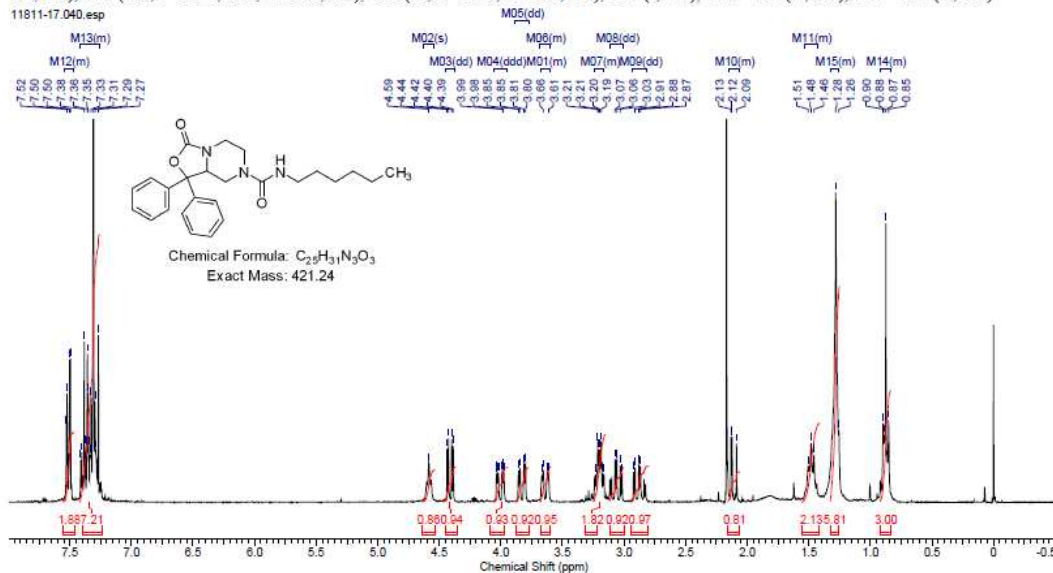

## Compound 22

|                        |                                                                                                                              |                   |                      |                        |                      |
|------------------------|------------------------------------------------------------------------------------------------------------------------------|-------------------|----------------------|------------------------|----------------------|
| Acquisition Time (sec) | 2.6542                                                                                                                       | Date              | 24 Jun 2008 18:42:08 | Date Stamp             | 24 Jun 2008 18:42:08 |
| File Name              | C:\Documents and Settings\hassler\My Documents\NMR\SPR NMR data raw files\SPR Archive data nmr\2008\2008\Jun24-08-run\10\fid |                   |                      |                        |                      |
| Frequency (MHz)        | 300.13                                                                                                                       | Nucleus           | <sup>1</sup> H       | Number of Transients   | 16                   |
| Original Points Count  | 16384                                                                                                                        | Owner             | nmrUSER              | Points Count           | 16384                |
| Receiver Gain          | 362.00                                                                                                                       | SW(cyclical) (Hz) | 6172.84              | Solvent                | CHLOROFORM-d         |
| Spectrum Type          | STANDARD                                                                                                                     | Sweep Width (Hz)  | 6172.46              | Temperature (degree C) | 27.000               |
|                        |                                                                                                                              |                   |                      | Spectrum Offset (Hz)   | 1848.8284            |

<sup>1</sup>H NMR (300 MHz, CHLOROFORM-d)  $\delta$  ppm 1.87 (br. s., 1 H), 2.14 (dd,  $J=13.19, 11.30$  Hz, 1 H), 2.41 (s, 3 H), 2.73 (t,  $J=5.65$  Hz, 2 H), 2.86 (td,  $J=12.81, 3.77$  Hz, 1 H), 3.08 (td,  $J=12.72, 3.58$  Hz, 1 H), 3.23 - 3.38 (m, 2 H), 3.67 - 3.75 (m, 1 H), 3.84 (dd,  $J=13.19, 2.64$  Hz, 1 H), 4.02 (ddd,  $J=13.37, 3.58, 1.13$  Hz, 1 H), 4.41 (dd,  $J=11.30, 3.77$  Hz, 1 H), 5.26 - 5.34 (m, 1 H), 7.25 - 7.42 (m, 8 H), 7.48 - 7.58 (m, 2 H)

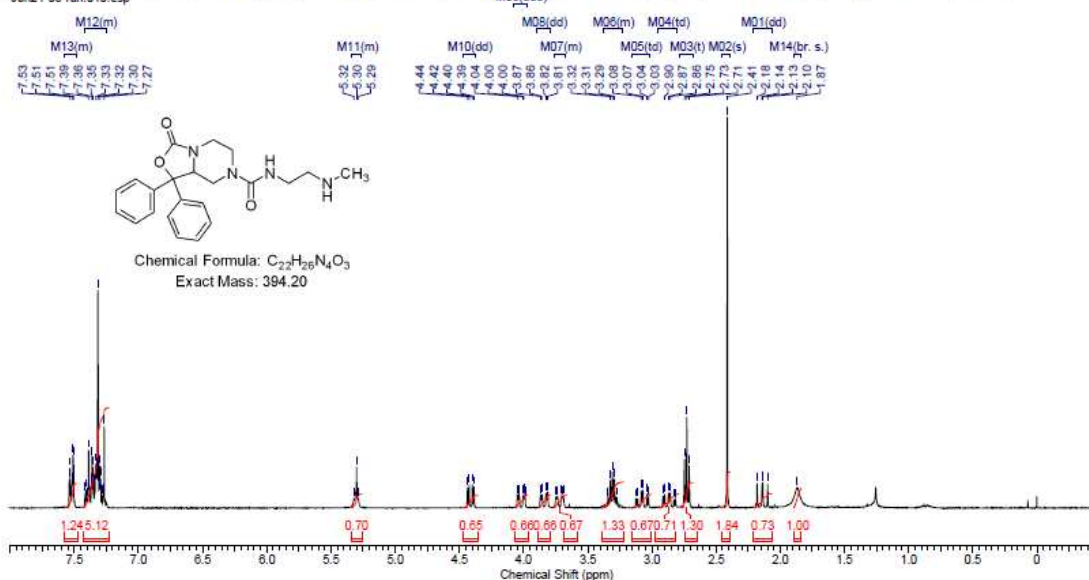

## Compound 23

|                        |                                                                  |                   |                |                        |                      |
|------------------------|------------------------------------------------------------------|-------------------|----------------|------------------------|----------------------|
| Acquisition Time (sec) | 2.6542                                                           | Comment           | 11811-149-3    | Date                   | 27 Mar 2008 22:49:38 |
| Date Stamp             | 27 Mar 2008 22:49:38                                             |                   |                |                        |                      |
| File Name              | E:\Experimentals\Yzhang archive data 2008\nmr\11811-149-3\60\fid |                   |                |                        |                      |
| Frequency (MHz)        | 300.13                                                           | Nucleus           | <sup>1</sup> H | Number of Transients   | 16                   |
| Original Points Count  | 16384                                                            | Owner             | nmrUSER        | Points Count           | 16384                |
| Receiver Gain          | 812.70                                                           | SW(cyclical) (Hz) | 6172.84        | Solvent                | CHLOROFORM-d         |
| Spectrum Type          | STANDARD                                                         | Sweep Width (Hz)  | 6172.46        | Temperature (degree C) | 27.000               |
|                        |                                                                  |                   |                | Spectrum Offset (Hz)   | 1847.8197            |

<sup>1</sup>H NMR (300 MHz, CHLOROFORM-d)  $\delta$  ppm 1.62 - 1.67 (m, 3 H), 2.15 (dd,  $J=13.37, 11.11$  Hz, 1 H), 2.37 (s, 3 H), 2.70 - 2.78 (m, 2 H), 2.84 (dd,  $J=13.19, 3.39$  Hz, 1 H), 3.07 (td,  $J=12.62, 3.77$  Hz, 1 H), 3.28 - 3.41 (m, 2 H), 3.67 - 3.77 (m, 1 H), 3.83 (dd,  $J=13.37, 2.83$  Hz, 1 H), 3.90 - 3.98 (m, 1 H), 4.41 (dd,  $J=11.30, 3.77$  Hz, 1 H), 6.92 (d,  $J=4.90$  Hz, 1 H), 7.26 - 7.44 (m, 8 H), 7.48 - 7.56 (m, 2 H)

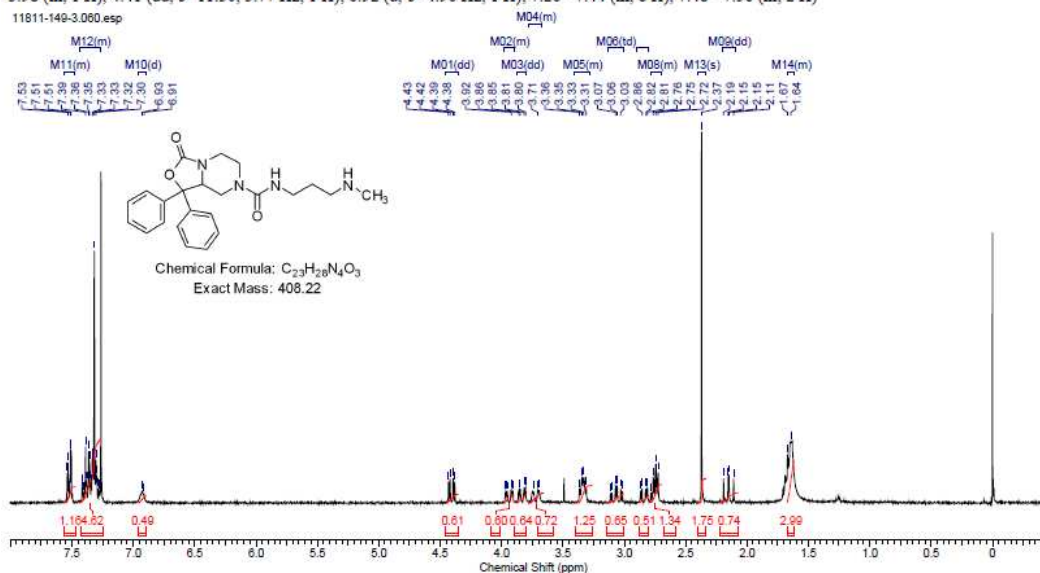



## Compound 24

|                        |                      |                   |                |                        |                                                                 |
|------------------------|----------------------|-------------------|----------------|------------------------|-----------------------------------------------------------------|
| Acquisition Time (sec) | 2.6542               | Comment           | 11811-147-3    | Date                   | 25 Mar 2008 16:25:36                                            |
| Date Stamp             | 25 Mar 2008 16:25:36 |                   |                | File Name              | E:\Experimentals\Yzhang archive data 2008\nmr\11811-147-340\fid |
| Frequency (MHz)        | 300.13               | Nucleus           | <sup>1</sup> H | Number of Transients   | 16                                                              |
| Original Points Count  | 16384                | Owner             | nmr\USER       | Points Count           | 16384                                                           |
| Receiver Gain          | 512.00               | SW(cyclical) (Hz) | 6172.84        | Solvent                | CHLOROFORM-d                                                    |
| Spectrum Offset (Hz)   | 1848.3538            | Spectrum Type     | STANDARD       | Sweep Width (Hz)       | 6172.46                                                         |
|                        |                      |                   |                | Temperature (degree C) | 27.000                                                          |

<sup>1</sup>H NMR (300 MHz, CHLOROFORM-d)  $\delta$  ppm 1.61 - 1.68 (m, 3 H), 2.14 - 2.21 (m, 6 H), 2.37 - 2.45 (m, 2 H), 2.79 - 2.87 (m, 1 H), 3.00 - 3.08 (m, 1 H), 3.28 - 3.36 (m, 2 H), 3.62 - 3.73 (m, 1 H), 3.83 (dd,  $J=12.81, 2.64$  Hz, 1 H), 3.89 (br. s., 1 H), 4.40 (dd,  $J=11.11, 3.58$  Hz, 1 H), 7.16 (br. s., 1 H), 7.28 - 7.44 (m, 8 H), 7.48 - 7.55 (m, 2 H)

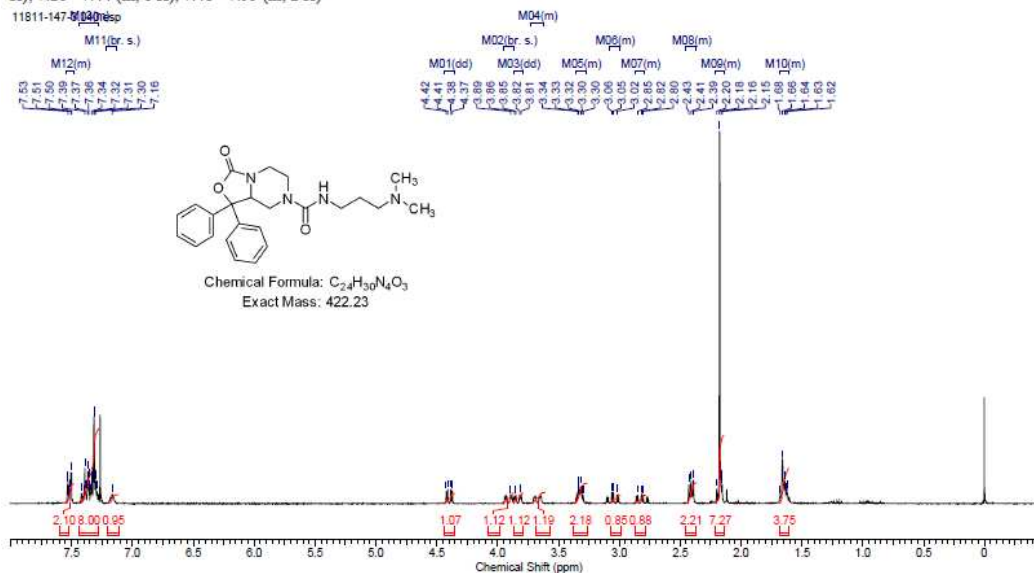

## Compound 25

|                        |                      |                   |                |                        |                                                                      |
|------------------------|----------------------|-------------------|----------------|------------------------|----------------------------------------------------------------------|
| Acquisition Time (sec) | 2.6542               | Comment           | 13646-24-2     | Date                   | 27 Mar 2013 13:42:24                                                 |
| Date Stamp             | 27 Mar 2013 13:42:24 |                   |                | File Name              | C:\Documents and Settings\chasser\My Documents\NMR\13646-24-2\10\fid |
| Frequency (MHz)        | 300.13               | Nucleus           | <sup>1</sup> H | Number of Transients   | 128                                                                  |
| Original Points Count  | 16384                | Owner             | nmr\USER       | Points Count           | 16384                                                                |
| Receiver Gain          | 512.00               | SW(cyclical) (Hz) | 6172.84        | Solvent                | CHLOROFORM-d                                                         |
| Spectrum Offset (Hz)   | 1842.1953            | Spectrum Type     | STANDARD       | Sweep Width (Hz)       | 6172.46                                                              |
|                        |                      |                   |                | Temperature (degree C) | 27.000                                                               |

<sup>1</sup>H NMR (300 MHz, CHLOROFORM-d)  $\delta$  ppm 1.97 - 2.20 (m, 5 H), 2.75 - 2.92 (m, 6 H), 3.05 (td,  $J=12.62, 3.39$  Hz, 1 H), 3.58 (d,  $J=12.06$  Hz, 2 H), 3.76 - 4.05 (m, 4 H), 4.38 (dd,  $J=11.11, 3.58$  Hz, 1 H), 6.52 (br. s., 1 H), 7.20 - 7.44 (m, 8 H), 7.46 - 7.58 (m, 2 H), 10.63 - 10.68 (m, 0 H), 11.56 (br. s., 1 H)

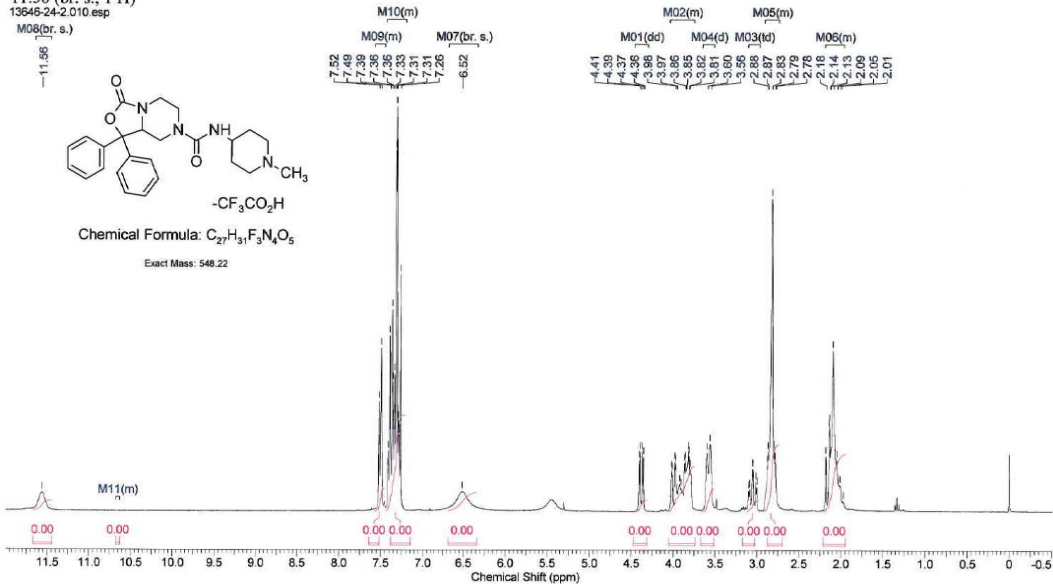

## Compound 26

|                        |                      |                      |                                                                         |                      |                      |
|------------------------|----------------------|----------------------|-------------------------------------------------------------------------|----------------------|----------------------|
| Acquisition Time (sec) | 2.6542               | Comment              | 13646-17-1                                                              | Date                 | 20 Feb 2013 14:24:48 |
| Date Stamp             | 20 Feb 2013 14:24:48 | File Name            | C:\Documents and Settings\chassier\My Documents\NMR\13646-17-1\1010.fid |                      |                      |
| Frequency (MHz)        | 300.13               | Nucleus              | 1H                                                                      | Number of Transients | 64                   |
| Origin                 | nmrUSER              | Points Count         | 16384                                                                   | Pulse Sequence       | zg                   |
| Solvent                | CHLOROFORM-d         | Spectrum Offset (Hz) | 1843.3958                                                               | Receiver Gain        | 256.00               |
| Temperature (degree C) | 27.000               | Spectrum Type        | STANDARD                                                                | SW (Hz)              | 6172.54              |
|                        |                      |                      |                                                                         | Sweep Width (Hz)     | 6172.46              |

<sup>1</sup>H NMR (300 MHz, CHLOROFORM-d) δ ppm 1.42 - 1.48 (m, 9 H), 1.60 - 1.92 (m, 1 H), 2.02 - 2.24 (m, 2 H), 2.87 (br. s., 1 H), 3.02 - 3.25 (m, 2 H), 3.34 - 3.66 (m, 6 H), 3.71 - 3.90 (m, 2 H), 4.09 - 4.21 (m, 1 H), 4.55 (ddd, J=10.83, 6.88, 3.39 Hz, 1 H), 7.28 - 7.44 (m, 8 H), 7.50 - 7.57 (m, 2 H)

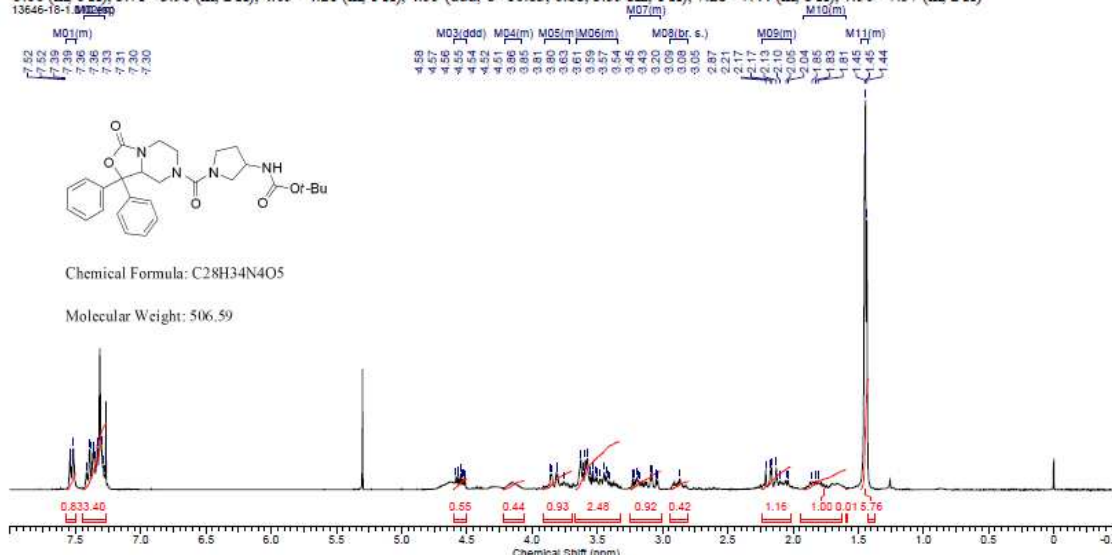

## Compound 27

13646-21-1

13646-21-1010.esp

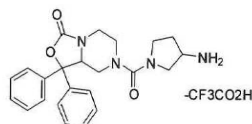

Chemical Formula: C<sub>25</sub>H<sub>27</sub>F<sub>3</sub>N<sub>4</sub>O<sub>5</sub>  
Exact Mass: 520.19

Chemical Formula: C<sub>23</sub>H<sub>26</sub>N<sub>4</sub>O<sub>3</sub>

Molecular Weight: 406.48

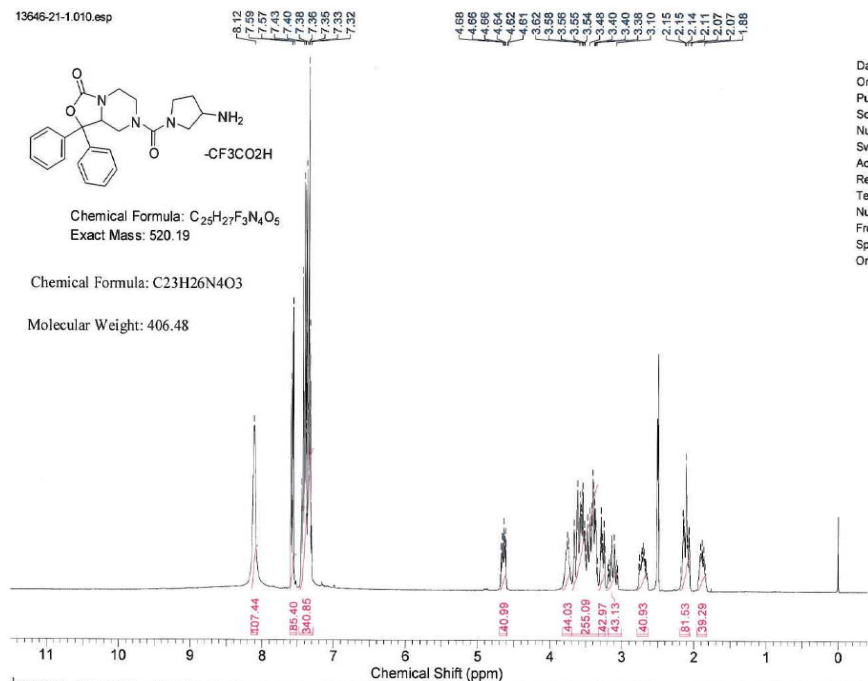

<sup>1</sup>H NMR (300 MHz, DMSO-d<sub>6</sub>) δ ppm 1.82 - 1.95 (1 H, m), 2.06 - 2.20 (2 H, m), 2.65 - 2.78 (1 H, m), 3.05 - 3.21 (1 H, m), 3.27 (1 H, dt, J=11.6, 4.0 Hz), 3.33 - 3.70 (6 H, m), 3.75 (1 H, d, J=4.5 Hz), 4.64 (1 H, ddd, J=10.8, 6.3, 3.6 Hz), 7.29 - 7.48 (8 H, m), 7.58 (2 H, d, J=7.5 Hz), 8.12 (3 H, br. s.)

**RTI**  
INTERNATIONAL  
NMR Laboratory

Date Stamp 04 Apr 2013 13:21:04  
Origin spect  
Pulse Sequence zg  
Solvent DMSO-d6  
Number of Transients 128  
Sweep Width (Hz) 6172.46  
Acquisition Time (sec) 2.6542  
Receiver Gain 256.00  
Temperature (degree C) 27.000  
Nucleus 1H  
Frequency (MHz) 300.13  
Spectrum Offset (Hz) 1853.6180  
Original Points Count 16384

## Compound 28

|                        |                      |                   |                |                        |                                                                         |
|------------------------|----------------------|-------------------|----------------|------------------------|-------------------------------------------------------------------------|
| Acquisition Time (sec) | 2.6542               | Comment           | 14646-31-1-1   | Date                   | 13 Mar 2013 10:56:00                                                    |
| Date Stamp             | 13 Mar 2013 10:56:00 |                   |                | File Name              | C:\Documents and Settings\chassier\My Documents\WNR\13646-31-1-1\10\fid |
| Frequency (MHz)        | 300.13               | Nucleus           | <sup>1</sup> H | Number of Transients   | 128                                                                     |
| Original Points Count  | 16384                | Owner             | nmrUSER        | Points Count           | 16384                                                                   |
| Receiver Gain          | 1290.20              | SW(cyclical) (Hz) | 6172.84        | Solvent                | CHLOROFORM-d                                                            |
| Spectrum Offset (Hz)   | 1841.6641            | Spectrum Type     | STANDARD       | Sweep Width (Hz)       | 6172.46                                                                 |
|                        |                      |                   |                | Temperature (degree C) | 27.000                                                                  |

<sup>1</sup>H NMR (300 MHz, CHLOROFORM-d)  $\delta$  ppm 1.39 - 1.52 (m, 9 H), 2.08 - 2.23 (m, 2 H), 2.85 - 3.01 (m, 1 H), 3.02 - 3.16 (m, 2 H), 3.41 (br. s., 2 H), 3.61 (d,  $J=5.65$  Hz, 2 H), 3.84 (br. s., 1 H), 3.94 - 4.07 (m, 1 H), 4.27 - 4.38 (m, 1 H), 4.38 - 4.49 (m, 2 H), 7.27 - 7.46 (m, 8 H), 7.47 - 7.57 (m, 2 H)

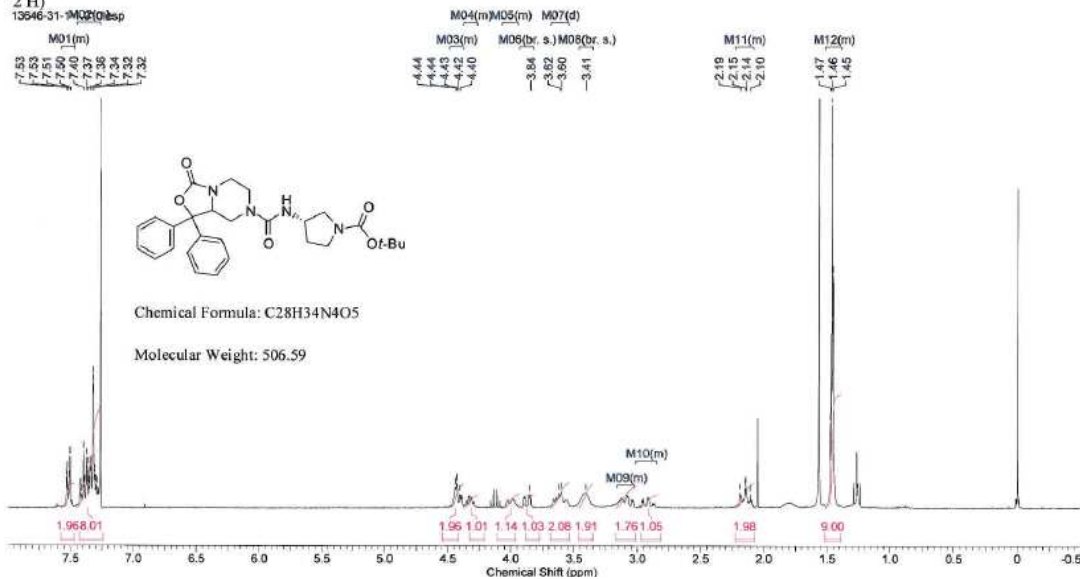

## Compound 29

|                        |                      |                   |                |                        |                                                                       |
|------------------------|----------------------|-------------------|----------------|------------------------|-----------------------------------------------------------------------|
| Acquisition Time (sec) | 2.6542               | Comment           | 13646-32-1     | Date                   | 18 Mar 2013 15:09:52                                                  |
| Date Stamp             | 18 Mar 2013 15:09:52 |                   |                | File Name              | C:\Documents and Settings\chassier\My Documents\WNR\13646-32-1\10\fid |
| Frequency (MHz)        | 300.13               | Nucleus           | <sup>1</sup> H | Number of Transients   | 128                                                                   |
| Original Points Count  | 16384                | Owner             | nmrUSER        | Points Count           | 16384                                                                 |
| Receiver Gain          | 1290.20              | SW(cyclical) (Hz) | 6172.84        | Solvent                | CHLOROFORM-d                                                          |
| Spectrum Offset (Hz)   | 1841.5530            | Spectrum Type     | STANDARD       | Sweep Width (Hz)       | 6172.46                                                               |
|                        |                      |                   |                | Temperature (degree C) | 27.000                                                                |

<sup>1</sup>H NMR (300 MHz, CHLOROFORM-d)  $\delta$  ppm 2.05 - 2.21 (m, 2 H), 2.35 (d,  $J=7.16$  Hz, 1 H), 2.71 - 2.92 (m, 1 H), 3.03 (t,  $J=12.24$  Hz, 1 H), 3.17 - 3.6 4 H), 3.84 (t,  $J=13.00$  Hz, 2 H), 3.95 - 4.12 (m, 1 H), 4.40 (ddd,  $J=11.02, 7.44, 3.77$  Hz, 1 H), 4.60 (br. s., 1 H), 7.28 - 7.43 (m, 8 H), 7.45 - 7.58 (m, 2 H), 8.78 (br. s., 1 H), 9.84 (br. s., 1 H)

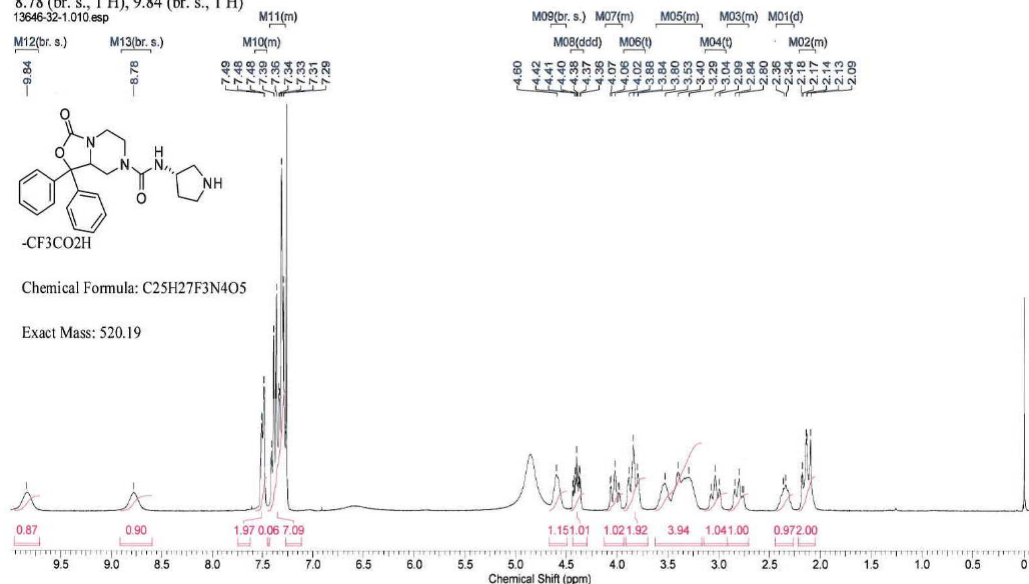

# Compound 30

|                        |                      |                   |                                                                       |                        |                      |
|------------------------|----------------------|-------------------|-----------------------------------------------------------------------|------------------------|----------------------|
| Acquisition Time (sec) | 2.6542               | Comment           | 13646-34-2                                                            | Date                   | 02 Apr 2013 17:15:44 |
| Date Stamp             | 02 Apr 2013 17:15:44 | File Name         | C:\Documents and Settings\chassier\My Documents\NMR\13646-34-2\10\fid |                        |                      |
| Frequency (MHz)        | 300.13               | Nucleus           | 1H                                                                    | Number of Transients   | 128                  |
| Original Points Count  | 16384                | Owner             | nmrUSER                                                               | Points Count           | 16384                |
| Receiver Gain          | 406.40               | SW(cyclical) (Hz) | 6172.84                                                               | Solvent                | CHLOROFORM-d         |
| Spectrum Offset (Hz)   | 1842.1055            | Spectrum Type     | STANDARD                                                              | Sweep Width (Hz)       | 6172.46              |
|                        |                      |                   |                                                                       | Temperature (degree C) | 27.000               |

<sup>1</sup>H NMR (300 MHz, CHLOROFORM-d) δ ppm 1.32 - 1.53 (m, 1 H), 2.04 (t, *J*=13.00 Hz, 2 H), 2.48 - 2.96 (m, 5 H), 2.96 - 3.19 (m, 3 H), 3.19 - 3.81 (m, 7 H), 3.92 (d, *J*=10.17 Hz, 1 H), 4.37 (t, *J*=7.72 Hz, 1 H), 4.48 - 4.69 (m, 1 H), 7.17 - 7.70 (m, 10 H), 8.77 (br. s., 1 H)

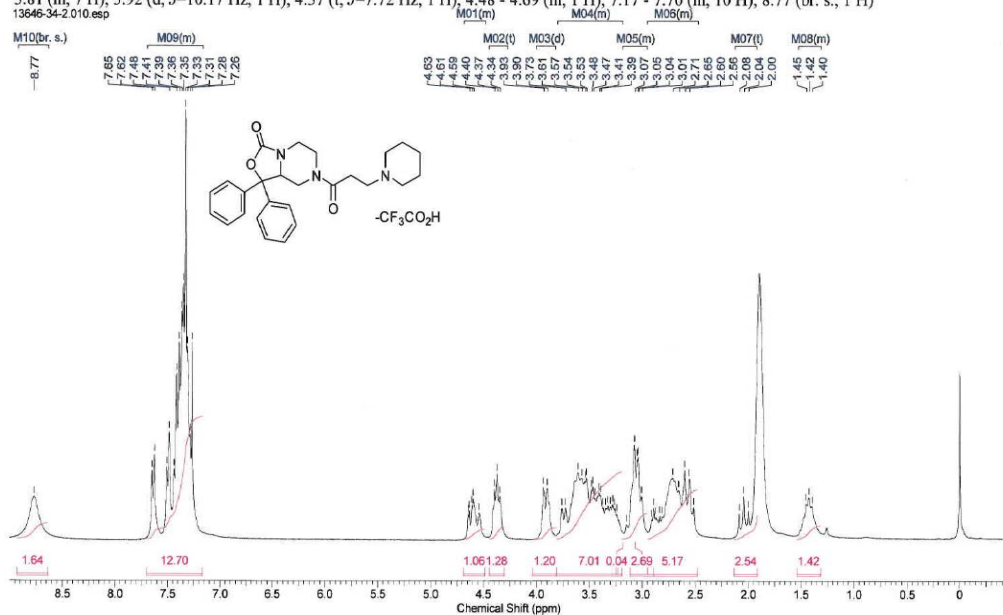

**RP Analytical HPLC chromatograms:**

**Compound 1 (SHA-68)**

**Chromatogram : 13646-25 fr 32 auto B 5to95 20minhold52\_26\_2013 6\_31\_12 PM**

System : autosampler Prostar 410-210-335-ELSD  
 Method : auto B 5 to 95 over 20 min  
 User : Carla

Acquired : 2/26/2013 8:32:22 PM  
 Processed : 2/27/2013 12:30:01 PM  
 Printed : 9/25/2013 5:08:46 PM

13646-25 fr 32 auto B 5to95 20minhold52\_26\_2013 6\_31\_12 PM1.DATA - Prostar 335 Absorbance Analog Channel 1 EL06059071

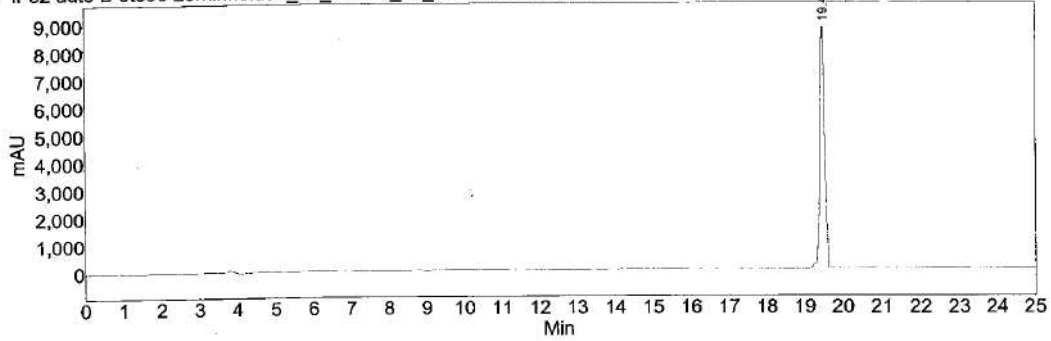

| Index | Name    | Time (Min) | Quantity [% Area] | Height (mAU) | Area (mAU.Min) | Area % [%] |
|-------|---------|------------|-------------------|--------------|----------------|------------|
| 1     | UNKNOWN | 19.47      | 100.00            | 8693.6       | 1280.3         | 100.000    |
| Total |         |            | 100.00            | 8693.6       | 1280.3         | 100.000    |

**Compound 2 (RTI-118)**

**Chromatogram : 13646-8-1 repur auto B 5to95 20minhold52\_21\_2013 1\_50\_41 PI**

System : autosampler Prostar 410-210-335-ELSD  
 Method : auto B 5 to 95 over 20 min  
 User : Carla

Acquired : 2/21/2013 1:51:51 PM  
 Processed : 2/21/2013 2:30:21 PM  
 Printed : 9/25/2013 1:27:14 PM

13646-8-1 repur auto B 5to95 20minhold52\_21\_2013 1\_50\_41 PM1.DATA - Prostar 335 Absorbance Analog Channel 1 EL0605907

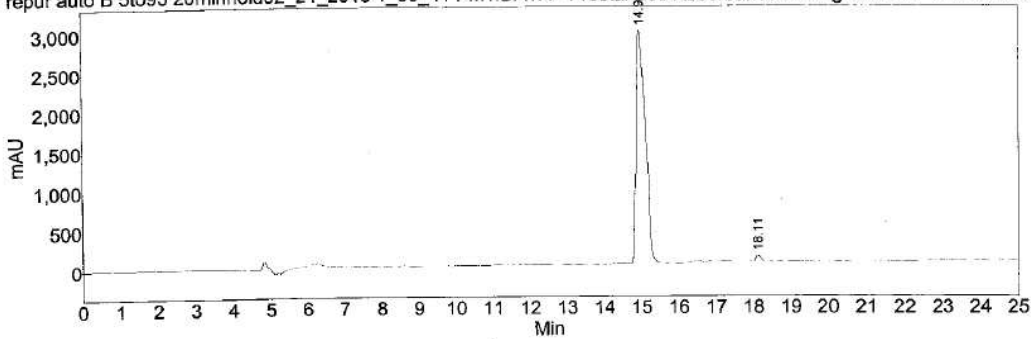

| Index | Name    | Time (Min) | Quantity [% Area] | Height (mAU) | Area (mAU.Min) | Area % [%] |
|-------|---------|------------|-------------------|--------------|----------------|------------|
| 1     | UNKNOWN | 14.95      | 99.24             | 2963.2       | 844.9          | 99.238     |
| 2     | UNKNOWN | 18.11      | 0.76              | 63.7         | 6.5            | 0.762      |
| Total |         |            | 100.00            | 3026.9       | 851.4          | 100.000    |



# Compound 6

## Chromatogram : r06039-152 12-16-08\_channel2

System : NOT DEFINED  
 Method : NOT DEFINED  
 User : Tyler Graf

Acquired : 12/17/2008 3:14:30 AM  
 Processed : 12/13/2013 3:19:38 PM  
 Printed : 12/13/2013 3:19:48 PM

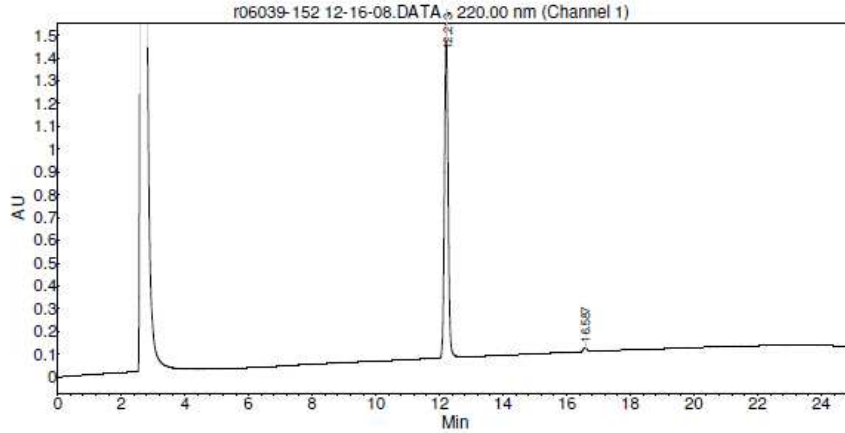

### Peak results :

| Index | Name    | Time [Min] | Quantity [% Area] | Width 50% [Min] | Height % [%] | Height [AU] | Area [AU.Sec] | Area % [%] |
|-------|---------|------------|-------------------|-----------------|--------------|-------------|---------------|------------|
| 1     | UNKNOWN | 12.213     | 98.71             | 0.13            | 98.657       | 1.4         | 11.3          | 98.712     |
| 2     | UNKNOWN | 16.587     | 1.29              | 0.12            | 1.343        | 0.0         | 0.1           | 1.288      |
| Total |         |            | 100.00            |                 | 100.000      | 1.4         | 11.5          | 100.000    |

# Compound 7

## Chromatogram : 13646-29-1 auto B 5to95 20minhold53\_4\_2013 4\_33\_04 PM1\_ch

System : autosampler Prostar 410-210-335-ELSD  
 Method : auto B 5 to 95 over 20 min  
 User : Carla

Acquired : 3/4/2013 4:34:14 PM  
 Processed : 3/4/2013 5:42:41 PM  
 Printed : 9/25/2013 5:11:56 PM

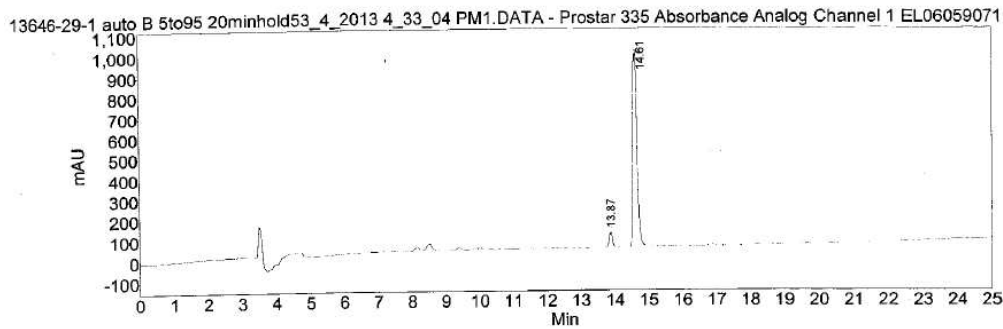

| Index | Name    | Time [Min] | Quantity [% Area] | Height [mAU] | Area [mAU.Min] | Area % [%] |
|-------|---------|------------|-------------------|--------------|----------------|------------|
| 1     | UNKNOWN | 13.87      | 4.95              | 71.5         | 7.1            | 4.955      |
| 2     | UNKNOWN | 14.61      | 95.05             | 956.0        | 136.0          | 95.045     |
| Total |         |            | 100.00            | 1027.5       | 143.1          | 100.000    |

## Compound 8

### Chromatogram : 13646-28-1 auto B 5to95 20minhold53\_1\_2013 4\_06\_01 PM1\_ch

System : autosampler Prostar 410-210-335-ELSD  
Method : auto B 5 to 95 over 20 min  
User : Carla

Acquired : 3/1/2013 4:07:08 PM  
Processed : 3/1/2013 4:53:57 PM  
Printed : 12/27/2013 3:38:07 PM

13646-28-1 auto B 5to95 20minhold53\_1\_2013 4\_06\_01 PM1.DATA - Prostar 335 Absorbance Analog Channel 1 EL06059071

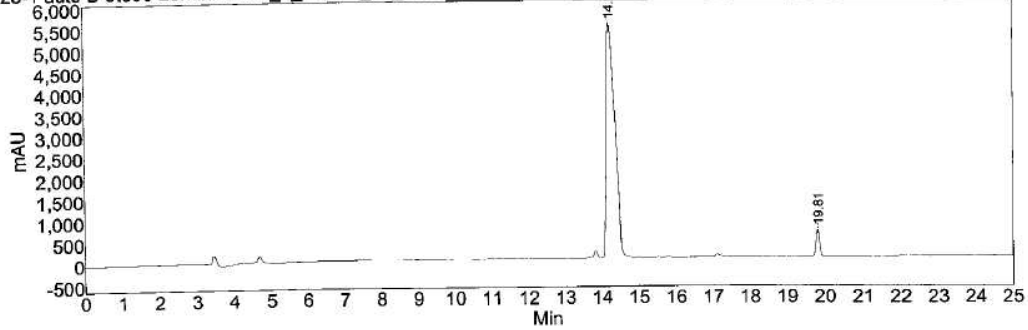

| Index | Name    | Time (Min) | Quantity (% Area) | Height (mAU) | Area (mAU.Min) | Area % (%) |
|-------|---------|------------|-------------------|--------------|----------------|------------|
| 1     | UNKNOWN | 14.20      | 95.98             | 5462.3       | 1483.1         | 95.979     |
| 2     | UNKNOWN | 19.81      | 4.02              | 612.0        | 62.1           | 4.021      |
| Total |         |            | 100.00            | 6074.3       | 1545.2         | 100.000    |

## Compound 9

### Chromatogram : 13646-27-2 auto B 5to95 20minhold53\_1\_2013 3\_33\_45 PM1\_ch

System : autosampler Prostar 410-210-335-ELSD  
Method : auto B 5 to 95 over 20 min  
User : Carla

Acquired : 3/1/2013 3:34:54 PM  
Processed : 3/1/2013 4:54:42 PM  
Printed : 12/27/2013 3:39:14 PM

13646-27-2 auto B 5to95 20minhold53\_1\_2013 3\_33\_45 PM1.DATA - Prostar 335 Absorbance Analog Channel 1 EL06059071

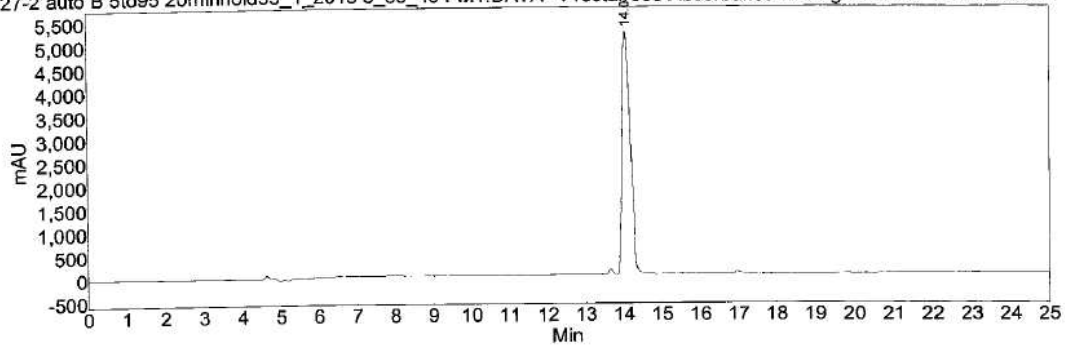

| Index | Name    | Time (Min) | Quantity (% Area) | Height (mAU) | Area (mAU.Min) | Area % (%) |
|-------|---------|------------|-------------------|--------------|----------------|------------|
| 1     | UNKNOWN | 14.04      | 100.00            | 5182.4       | 1301.8         | 100.000    |
| Total |         |            | 100.00            | 5182.4       | 1301.8         | 100.000    |

# Compound 10

## Chromatogram : 13545-10-2auto B 5to95 20minhold52\_18\_2013 7\_32\_47 PM1\_ct

System : autosampler Prostar 410-210-335-ELSD  
Method : auto B 5 to 95 over 20 min  
User : Carla

Acquired : 2/18/2013 7:33:58 PM  
Processed : 2/19/2013 11:02:43 AM  
Printed : 9/25/2013 5:15:45 PM

13545-10-2auto B 5to95 20minhold52\_18\_2013 7\_32\_47 PM1.DATA - Prostar 335 Absorbance Analog Channel 1 EL06059071

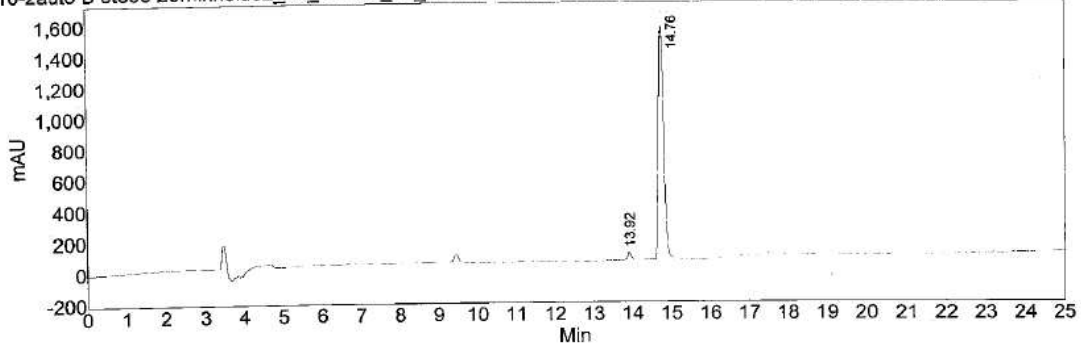

| Index | Name    | Time [Min] | Quantity [% Area] | Height [mAU] | Area [mAU.Min] | Area % [%] |
|-------|---------|------------|-------------------|--------------|----------------|------------|
| 1     | UNKNOWN | 13.92      | 2.13              | 53.5         | 5.1            | 2.131      |
| 2     | UNKNOWN | 14.76      | 97.87             | 1502.3       | 235.7          | 97.869     |
| Total |         |            | 100.00            | 1555.8       | 240.8          | 100.000    |

# Compound 11

## Chromatogram : 13646-11-2auto B 5to95 20minhold52\_18\_2013 7\_00\_31 PM1\_ct

System : autosampler Prostar 410-210-335-ELSD  
Method : auto B 5 to 95 over 20 min  
User : Carla

Acquired : 2/18/2013 7:01:40 PM  
Processed : 2/19/2013 11:03:54 AM  
Printed : 9/25/2013 5:16:54 PM

13646-11-2auto B 5to95 20minhold52\_18\_2013 7\_00\_31 PM1.DATA - Prostar 335 Absorbance Analog Channel 1 EL06059071

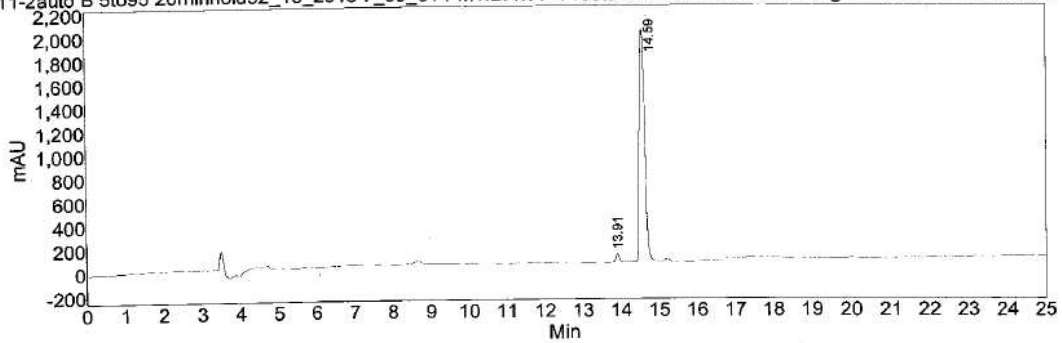

| Index | Name    | Time [Min] | Quantity [% Area] | Height [mAU] | Area [mAU.Min] | Area % [%] |
|-------|---------|------------|-------------------|--------------|----------------|------------|
| 1     | UNKNOWN | 13.91      | 2.08              | 70.4         | 6.7            | 2.077      |
| 2     | UNKNOWN | 14.59      | 97.92             | 1954.2       | 318.0          | 97.923     |
| Total |         |            | 100.00            | 2034.7       | 324.7          | 100.000    |

# Compound 12

## Chromatogram : 13646-13-2auto B 5to95 20minhold52\_19\_2013 1\_52\_01 PM1\_ct

System : autosampler Prostar 410-210-335-ELSD  
Method : auto B 5 to 95 over 20 min  
User : Carla

Acquired : 2/19/2013 1:53:09 PM  
Processed : 2/19/2013 2:32:14 PM  
Printed : 12/27/2013 3:40:35 PM

13646-13-2auto B 5to95 20minhold52\_19\_2013 1\_52\_01 PM1.DATA - Prostar 335 Absorbance Analog Channel 1 EL06059071

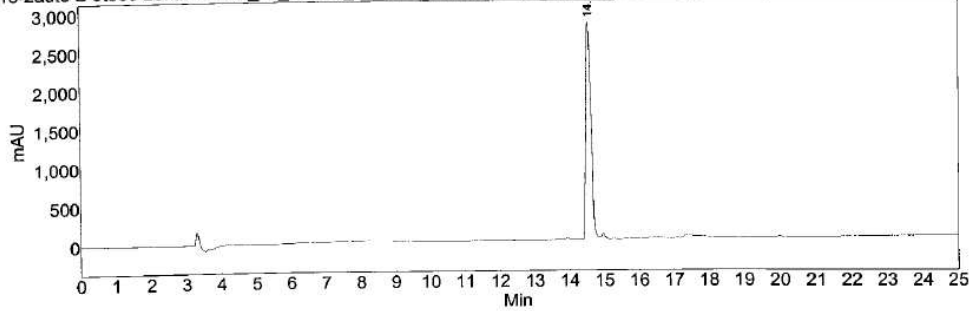

| Index | Name    | Time (Min) | Quantity (% Area) | Height (mAU) | Area (mAU Min) | Area (%) |
|-------|---------|------------|-------------------|--------------|----------------|----------|
| 1     | UNKNOWN | 14.55      | 100.00            | 2806.6       | 488.4          | 100.000  |
| Total |         |            | 100.00            | 2806.6       | 488.4          | 100.000  |

# Compound 13

## Chromatogram : R06039-282 auto B 5to95 20minhold512\_17\_2013 12\_56\_09 PM

System : autosampler Prostar 410-210-335-ELSD  
Method : auto B 5 to 95 over 20 min  
User : Carla

Acquired : 12/17/2013 12:57:17 PM  
Processed : 12/20/2013 3:07:35 PM  
Printed : 12/23/2013 11:45:16 AM

R06039-282 auto B 5to95 20minhold512\_17\_2013 12\_56\_09 PM1.DATA - Prostar 335 Absorbance Analog Channel 1 EL06059071

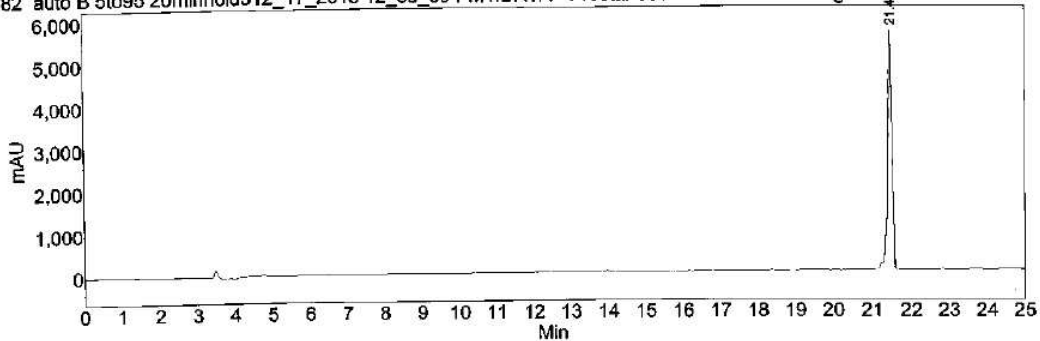

| Index | Name    | Time (Min) | Quantity (% Area) | Height (mAU) | Area (mAU Min) | Area (%) |
|-------|---------|------------|-------------------|--------------|----------------|----------|
| 1     | UNKNOWN | 21.48      | 100.00            | 5578.1       | 721.8          | 100.000  |
| Total |         |            | 100.00            | 5578.1       | 721.8          | 100.000  |

# Compound 14

## Chromatogram : R06039-283 auto B 5to95 20minhold512\_19\_2013 3\_45\_58 PM1

System : autosampler Prostar 410-210-335-ELSD  
Method : auto B 5 to 95 over 20 min  
User : Carla

Acquired : 12/19/2013 3:47:06 PM  
Processed : 12/19/2013 4:19:53 PM  
Printed : 12/23/2013 11:44:48 AM

R06039-283 auto B 5to95 20minhold512\_19\_2013 3\_45\_58 PM1.DATA - Prostar 335 Absorbance Analog Channel 1 EL06059071

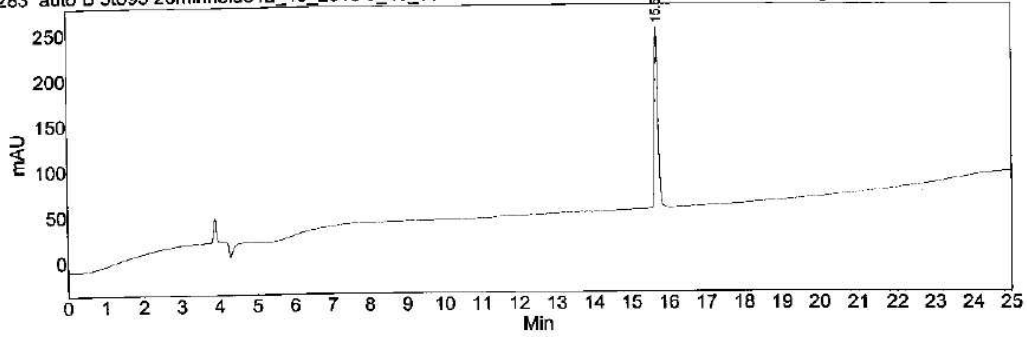

| Index | Time (min) | Quantity (%) | Height (mAU) | Area (mAU) | Area (%) |
|-------|------------|--------------|--------------|------------|----------|
| 1     | 15.68      | 100.00       | 197.7        | 20.9       | 100.000  |
| Total |            | 100.00       | 197.7        | 20.9       | 100.000  |

# Compound 15

## Chromatogram : R06039-284 auto B 5to95 20minhold512\_19\_2013 5\_55\_00 PM1

System : autosampler Prostar 410-210-335-ELSD  
Method : auto B 5 to 95 over 20 min  
User : Carla

Acquired : 12/19/2013 5:56:09 PM  
Processed : 12/20/2013 9:18:59 AM  
Printed : 12/23/2013 11:44:23 AM

R06039-284 auto B 5to95 20minhold512\_19\_2013 5\_55\_00 PM1.DATA - Prostar 335 Absorbance Analog Channel 1 EL06059071

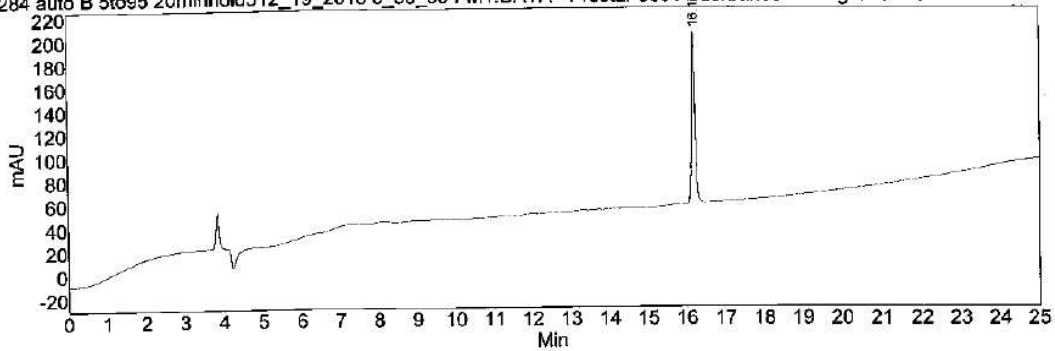

| Index | Time (min) | Quantity (%) | Height (mAU) | Area (mAU) | Area (%) |
|-------|------------|--------------|--------------|------------|----------|
| 1     | 16.17      | 100.00       | 146.0        | 15.4       | 100.000  |
| Total |            | 100.00       | 146.0        | 15.4       | 100.000  |

# Compound 16

## Chromatogram : r06039-164 12-17-08\_channel2

System : NOT DEFINED  
Method : NOT DEFINED  
User : Tyler Graf

Acquired : 12/17/2008 5:49:11 AM  
Processed : 12/13/2013 3:22:37 PM  
Printed : 12/13/2013 3:22:44 PM

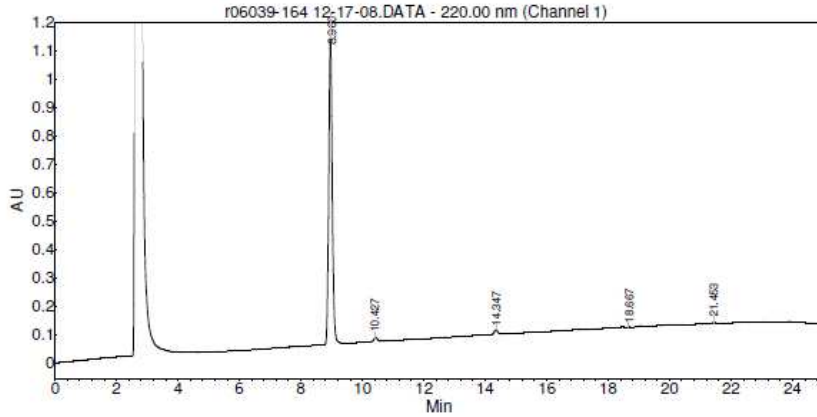

### Peak results :

| Index | Name    | Time [Min] | Quantity [% Area] | Width 50% [Min] | Height % [%] | Height [AU] | Area [AU.Sec] | Area % [%] |
|-------|---------|------------|-------------------|-----------------|--------------|-------------|---------------|------------|
| 1     | UNKNOWN | 8.960      | 96.98             | 0.12            | 96.679       | 1.1         | 8.6           | 96.984     |
| 2     | UNKNOWN | 10.427     | 1.29              | 0.12            | 1.332        | 0.0         | 0.1           | 1.286      |
| 3     | UNKNOWN | 14.347     | 1.36              | 0.12            | 1.413        | 0.0         | 0.1           | 1.365      |
| 4     | UNKNOWN | 18.667     | 0.09              | 0.07            | 0.183        | 0.0         | 0.0           | 0.086      |
| 5     | UNKNOWN | 21.453     | 0.28              | 0.09            | 0.394        | 0.0         | 0.0           | 0.280      |
| Total |         |            | 100.00            |                 | 100.000      | 1.1         | 8.9           | 100.000    |

# Compound 17

## Chromatogram : r06039-161 12-17-08\_channel2

System : NOT DEFINED  
Method : NOT DEFINED  
User : Tyler Graf

Acquired : 12/17/2008 5:18:16 AM  
Processed : 12/13/2013 3:21:38 PM  
Printed : 12/13/2013 3:21:54 PM

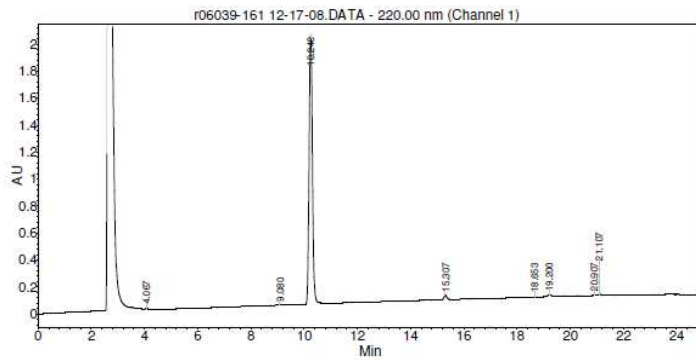

### Peak results :

| Index | Name    | Time [Min] | Quantity [% Area] | Width 50% [Min] | Height % [%] | Height [AU] | Area [AU.Sec] | Area % [%] |
|-------|---------|------------|-------------------|-----------------|--------------|-------------|---------------|------------|
| 1     | UNKNOWN | 4.067      | 0.10              | 0.07            | 0.175        | 0.0         | 0.0           | 0.099      |
| 2     | UNKNOWN | 9.080      | 0.15              | 0.11            | 0.198        | 0.0         | 0.0           | 0.145      |
| 3     | UNKNOWN | 10.240     | 96.93             | 0.13            | 96.612       | 2.0         | 16.9          | 96.933     |
| 4     | UNKNOWN | 15.307     | 1.48              | 0.12            | 1.639        | 0.0         | 0.3           | 1.478      |
| 5     | UNKNOWN | 18.653     | 0.04              | 0.08            | 0.095        | 0.0         | 0.0           | 0.042      |
| 6     | UNKNOWN | 19.200     | 0.72              | 0.18            | 0.870        | 0.0         | 0.1           | 0.717      |
| 7     | UNKNOWN | 20.907     | 0.12              | 0.10            | 0.175        | 0.0         | 0.0           | 0.123      |
| 8     | UNKNOWN | 21.107     | 0.46              | 0.10            | 0.535        | 0.0         | 0.1           | 0.461      |
| Total |         |            | 100.00            |                 | 100.000      | 2.0         | 17.5          | 100.000    |

# Compound 18

## Chromatogram : r06039-165 12-17-08\_channel2

System : NOT DEFINED  
Method : NOT DEFINED  
User : Tyler Graf

Acquired : 12/17/2008 6:20:05 AM  
Processed : 12/13/2013 3:23:37 PM  
Printed : 12/13/2013 3:30:13 PM

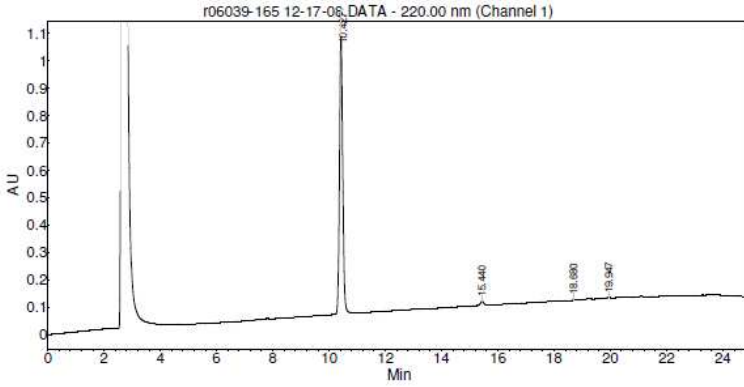

### Peak results :

| Index | Name    | Time [Min] | Quantity [% Area] | Width 50% [Min] | Height % [%] | Height [AU] | Area [AU.Sec] | Area % [%] |
|-------|---------|------------|-------------------|-----------------|--------------|-------------|---------------|------------|
| 1     | UNKNOWN | 10.427     | 98.32             | 0.12            | 98.063       | 1.0         | 8.1           | 98.320     |
| 2     | UNKNOWN | 15.440     | 1.39              | 0.12            | 1.438        | 0.0         | 0.1           | 1.392      |
| 3     | UNKNOWN | 18.680     | 0.09              | 0.07            | 0.200        | 0.0         | 0.0           | 0.090      |
| 4     | UNKNOWN | 19.947     | 0.20              | 0.09            | 0.299        | 0.0         | 0.0           | 0.198      |
| Total |         |            | 100.00            |                 | 100.000      | 1.0         | 8.2           | 100.000    |

# Compound 19

## Chromatogram : r06039-166 12-17-08\_channel2

System : NOT DEFINED  
Method : NOT DEFINED  
User : Tyler Graf

Acquired : 12/17/2008 6:50:59 AM  
Processed : 12/13/2013 3:31:12 PM  
Printed : 12/13/2013 3:31:22 PM

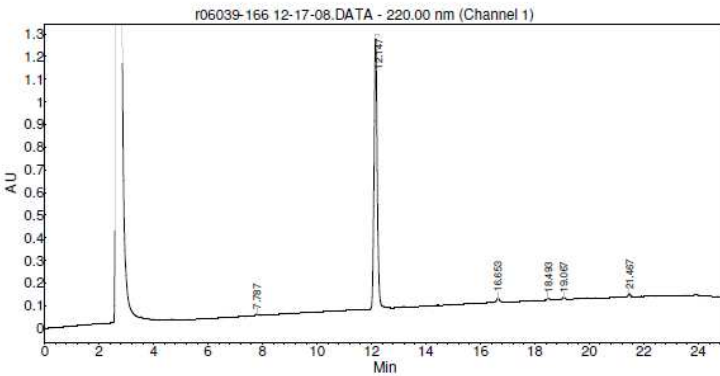

### Peak results :

| Index | Name    | Time [Min] | Quantity [% Area] | Width 50% [Min] | Height % [%] | Height [AU] | Area [AU.Sec] | Area % [%] |
|-------|---------|------------|-------------------|-----------------|--------------|-------------|---------------|------------|
| 1     | UNKNOWN | 7.787      | 0.37              | 0.11            | 0.450        | 0.0         | 0.0           | 0.367      |
| 2     | UNKNOWN | 12.147     | 98.34             | 0.12            | 96.649       | 1.2         | 9.7           | 98.337     |
| 3     | UNKNOWN | 16.653     | 1.33              | 0.12            | 1.397        | 0.0         | 0.1           | 1.331      |
| 4     | UNKNOWN | 18.483     | 0.52              | 0.10            | 0.654        | 0.0         | 0.1           | 0.518      |
| 5     | UNKNOWN | 19.067     | 0.66              | 0.10            | 0.802        | 0.0         | 0.1           | 0.660      |
| 6     | UNKNOWN | 21.467     | 0.79              | 0.09            | 1.048        | 0.0         | 0.1           | 0.786      |
| Total |         |            | 100.00            |                 | 100.000      | 1.2         | 10.0          | 100.000    |

# Compound 20

## Chromatogram : r06039-180 12-17-08\_channel2

System : NOT DEFINED  
Method : NOT DEFINED  
User : Tyler Graf

Acquired : 12/17/2008 9:25:35 AM  
Processed : 12/13/2013 3:34:13 PM  
Printed : 12/13/2013 3:40:41 PM

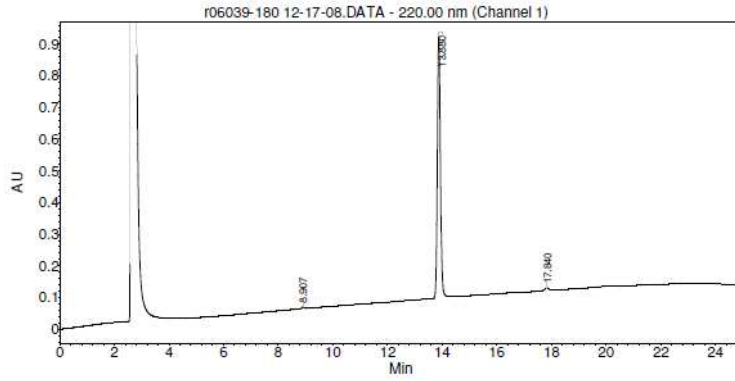

### Peak results :

| Index | Name    | Time [Min] | Quantity [% Area] | Width 50% [Min] | Height % [%] | Height [AU] | Area [AU.Sec] | Area % [%] |
|-------|---------|------------|-------------------|-----------------|--------------|-------------|---------------|------------|
| 1     | UNKNOWN | 8.907      | 0.46              | 0.10            | 0.569        | 0.0         | 0.0           | 0.458      |
| 2     | UNKNOWN | 13.880     | 98.54             | 0.12            | 98.549       | 0.8         | 6.4           | 98.542     |
| 3     | UNKNOWN | 17.840     | 1.00              | 0.14            | 0.883        | 0.0         | 0.1           | 1.000      |
| Total |         |            | 100.00            |                 | 100.000      | 0.8         | 6.5           | 100.000    |

# Compound 21

## Chromatogram : r06039-132 12-16-08\_channel2

System : NOT DEFINED  
Method : NOT DEFINED  
User : Tyler Graf

Acquired : 12/16/2008 11:06:56 PM  
Processed : 12/13/2013 3:08:40 PM  
Printed : 12/13/2013 3:12:57 PM

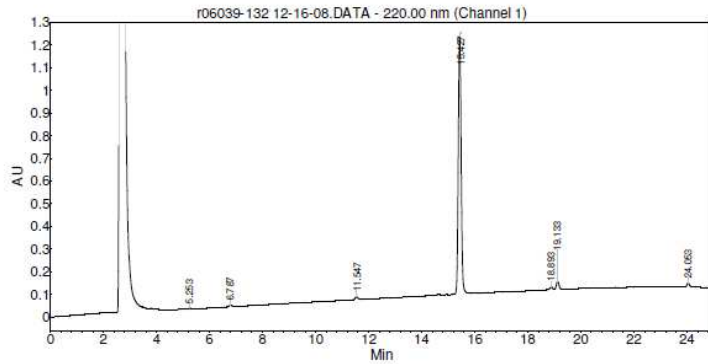

### Peak results :

| Index | Name    | Time [Min] | Quantity [% Area] | Width 50% [Min] | Height % [%] | Height [AU] | Area [AU.Sec] | Area % [%] |
|-------|---------|------------|-------------------|-----------------|--------------|-------------|---------------|------------|
| 1     | UNKNOWN | 5.253      | 0.19              | 0.09            | 0.270        | 0.0         | 0.0           | 0.189      |
| 2     | UNKNOWN | 6.787      | 0.58              | 0.13            | 0.566        | 0.0         | 0.1           | 0.581      |
| 3     | UNKNOWN | 11.547     | 1.02              | 0.12            | 1.012        | 0.0         | 0.1           | 1.018      |
| 4     | UNKNOWN | 15.427     | 92.95             | 0.11            | 92.805       | 1.1         | 8.4           | 92.961     |
| 5     | UNKNOWN | 18.893     | 1.28              | 0.12            | 1.085        | 0.0         | 0.1           | 1.280      |
| 6     | UNKNOWN | 18.133     | 2.92              | 0.11            | 2.959        | 0.0         | 0.1           | 2.918      |
| 7     | UNKNOWN | 24.053     | 1.05              | 0.09            | 1.303        | 0.0         | 0.1           | 1.054      |
| Total |         |            | 100.00            |                 | 100.000      | 1.2         | 9.0           | 100.000    |



# Compound 22

## Chromatogram : r06039-215\_channel2

System : NOT DEFINED  
Method : NOT DEFINED  
User : Tyler Graf

Acquired : 12/19/2008 5:53:02 AM  
Processed : 12/13/2013 3:44:42 PM  
Printed : 12/13/2013 3:44:48 PM

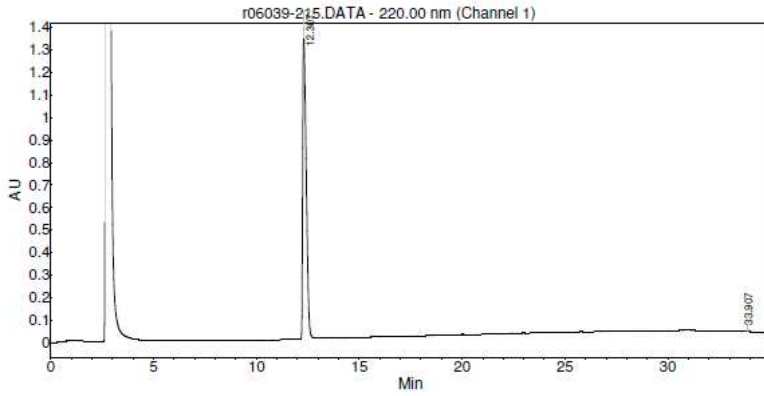

### Peak results :

| Index | Name    | Time [Min] | Quantity [% Area] | Width 50% [Min] | Height % [%] | Height [AU] | Area [AU.Sec] | Area % [%] |
|-------|---------|------------|-------------------|-----------------|--------------|-------------|---------------|------------|
| 1     | UNKNOWN | 12.307     | 99.82             | 0.19            | 99.641       | 1.3         | 15.8          | 99.816     |
| 2     | UNKNOWN | 33.907     | 0.18              | 0.09            | 0.359        | 0.0         | 0.0           | 0.184      |
| Total |         |            | 100.00            |                 | 100.000      | 1.3         | 15.8          | 100.000    |

# Compound 23

## Chromatogram : r06039-197\_channel2

System : NOT DEFINED  
Method : NOT DEFINED  
User : Tyler Graf

Acquired : 12/19/2008 3:50:13 AM  
Processed : 12/13/2013 3:43:18 PM  
Printed : 12/13/2013 3:43:25 PM

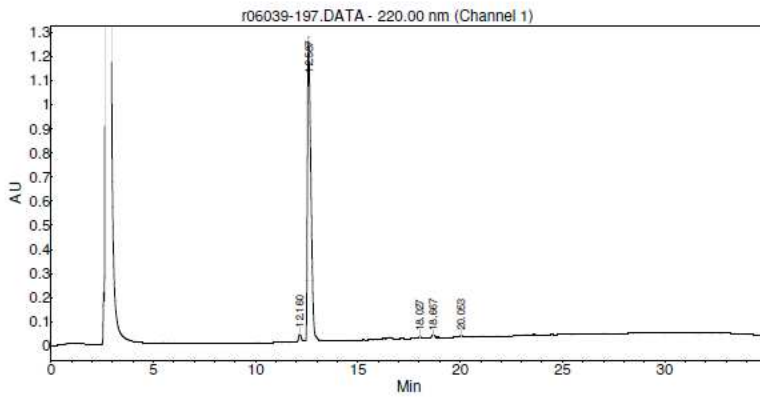

### Peak results :

| Index | Name    | Time [Min] | Quantity [% Area] | Width 50% [Min] | Height % [%] | Height [AU] | Area [AU.Sec] | Area % [%] |
|-------|---------|------------|-------------------|-----------------|--------------|-------------|---------------|------------|
| 1     | UNKNOWN | 12.160     | 1.96              | 0.13            | 2.514        | 0.0         | 0.3           | 1.956      |
| 2     | UNKNOWN | 12.587     | 96.67             | 0.19            | 95.678       | 1.2         | 14.8          | 96.672     |
| 3     | UNKNOWN | 18.027     | 0.36              | 0.13            | 0.514        | 0.0         | 0.1           | 0.361      |
| 4     | UNKNOWN | 18.667     | 0.77              | 0.17            | 0.925        | 0.0         | 0.1           | 0.766      |
| 5     | UNKNOWN | 20.053     | 0.25              | 0.13            | 0.369        | 0.0         | 0.0           | 0.245      |
| Total |         |            | 100.00            |                 | 100.000      | 1.3         | 15.3          | 100.000    |

# Compound 24

## Chromatogram : r06039-196\_channel2

System : NOT DEFINED  
 Method : NOT DEFINED  
 User : Tyler Graf

Acquired : 12/19/2008 3:09:19 AM  
 Processed : 12/13/2013 3:42:20 PM  
 Printed : 12/13/2013 3:42:34 PM

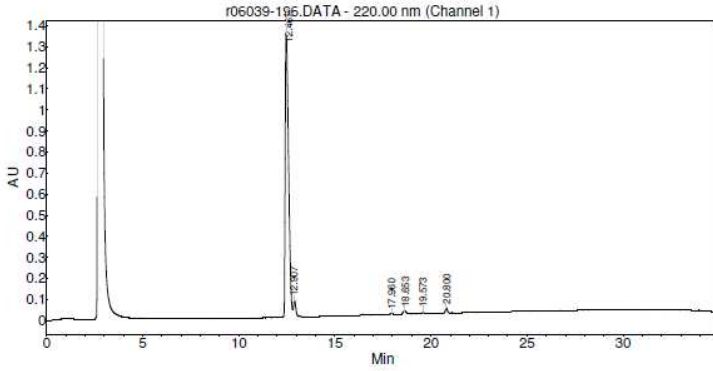

### Peak results :

| Index | Name    | Time [Min] | Quantity [% Area] | Width 50% [Min] | Height % [%] | Height [AU] | Area [AU.Sec] | Area % [%] |
|-------|---------|------------|-------------------|-----------------|--------------|-------------|---------------|------------|
| 1     | UNKNOWN | 12.467     | 93.76             | 0.20            | 91.439       | 1.3         | 18.3          | 93.762     |
| 2     | UNKNOWN | 12.907     | 3.89              | 0.15            | 5.182        | 0.1         | 0.7           | 3.893      |
| 3     | UNKNOWN | 17.960     | 0.36              | 0.14            | 0.486        | 0.0         | 0.1           | 0.356      |
| 4     | UNKNOWN | 18.653     | 0.82              | 0.17            | 0.948        | 0.0         | 0.1           | 0.825      |
| 5     | UNKNOWN | 19.573     | 0.19              | 0.11            | 0.324        | 0.0         | 0.0           | 0.188      |
| 6     | UNKNOWN | 20.800     | 0.98              | 0.11            | 1.620        | 0.0         | 0.2           | 0.978      |
| Total |         |            | 100.00            |                 | 100.000      | 1.5         | 17.4          | 100.000    |

# Compound 25

## Chromatogram : 13646-24 fr55 auto B 5to95 20minhold52\_26\_2013 5\_58\_57 PM1

System : autosampler Prostar 410-210-335-ELSD  
 Method : auto B 5 to 95 over 20 min  
 User : Carla

Acquired : 2/26/2013 6:00:05 PM  
 Processed : 2/27/2013 12:29:25 PM  
 Printed : 9/25/2013 5:20:36 PM

13646-24 fr55 auto B 5to95 20minhold52\_26\_2013 5\_58\_57 PM1.DATA - Prostar 335 Absorbance Analog Channel 1 EL06059071

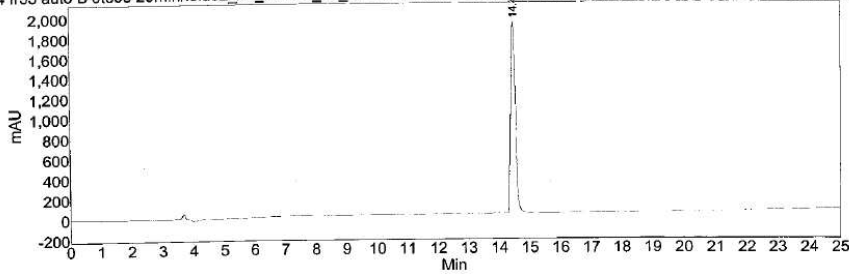

| Index | Name    | Time [Min] | Quantity [% Area] | Height [mAU] | Area [mAU.Min] | Area % [%] |
|-------|---------|------------|-------------------|--------------|----------------|------------|
| 1     | UNKNOWN | 14.47      | 100.00            | 1894.2       | 334.1          | 100.000    |
| Total |         |            | 100.00            | 1894.2       | 334.1          | 100.000    |

# Compound 26

## Chromatogram : 13646-11-1 auto B 5to95 20minhold52\_20\_2013 4\_15\_35 PM1\_c

System : autosampler Prostar 410-210-335-ELSD  
Method : auto B 5 to 95 over 20 min  
User : Carla

Acquired : 2/20/2013 4:16:43 PM  
Processed : 12/27/2013 3:42:46 PM  
Printed : 12/27/2013 3:43:00 PM

13646-11-1 auto B 5to95 20minhold52\_20\_2013 4\_15\_35 PM1.DATA - Prostar 335 Absorbance Analog Channel 1 EL06059071

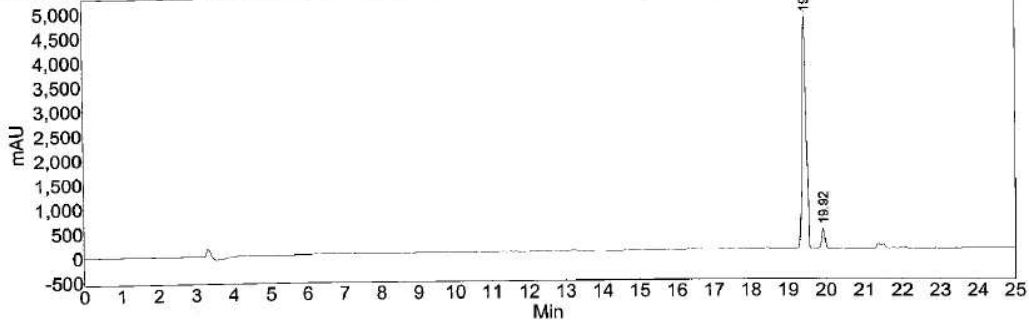

| Index | Name    | Time [Min] | Quantity [% Area] | Height [mAU] | Area [mAU.Min] | Area % [%] |
|-------|---------|------------|-------------------|--------------|----------------|------------|
| 1     | UNKNOWN | 19.45      | 95.35             | 4731.5       | 606.5          | 95.346     |
| 2     | UNKNOWN | 19.92      | 4.65              | 354.5        | 29.6           | 4.654      |
| Total |         |            | 100.00            | 5085.9       | 636.1          | 100.000    |

# Compound 27

## Chromatogram : 13646-21 fr 23 auto B 5to95 20minhold52\_22\_2013 1\_44\_35 PM'

System : autosampler Prostar 410-210-335-ELSD  
Method : auto B 5 to 95 over 20 min  
User : Carla

Acquired : 2/22/2013 1:45:43 PM  
Processed : 2/22/2013 2:27:55 PM  
Printed : 9/25/2013 5:22:06 PM

13646-21 fr 23 auto B 5to95 20minhold52\_22\_2013 1\_44\_35 PM1.DATA - Prostar 335 Absorbance Analog Channel 1 EL06059071

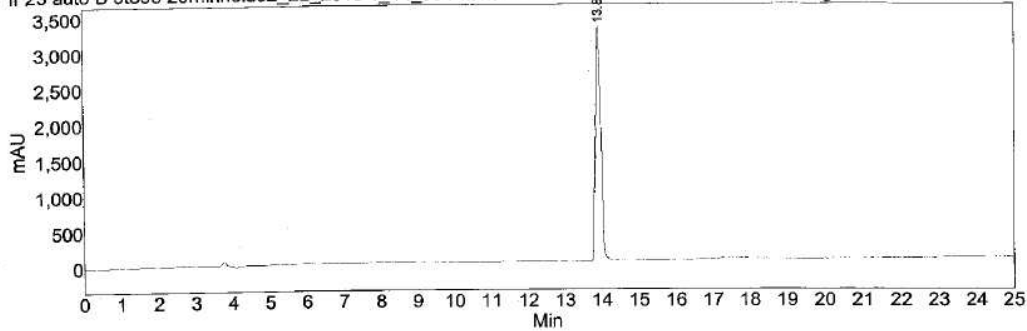

| Index | Name    | Time [Min] | Quantity [% Area] | Height [mAU] | Area [mAU.Min] | Area % [%] |
|-------|---------|------------|-------------------|--------------|----------------|------------|
| 1     | UNKNOWN | 13.39      | 100.00            | 3258.7       | 541.9          | 100.000    |
| Total |         |            | 100.00            | 3258.7       | 541.9          | 100.000    |

# Compound 28

## Chromatogram : 13646-31-1-1 auto B 5to95 20minhold53\_11\_2013 4\_24\_58 PM1\_

System : autosampler Prostar 410-210-335-ELSD  
Method : auto B 5 to 95 over 20 min  
User : Carla

Acquired : 3/11/2013 4:26:08 PM  
Processed : 3/11/2013 5:03:36 PM  
Printed : 12/27/2013 3:44:01 PM

13646-31-1-1 auto B 5to95 20minhold53\_11\_2013 4\_24\_58 PM1.DATA - Prostar 335 Absorbance Analog Channel 1 EL06059071

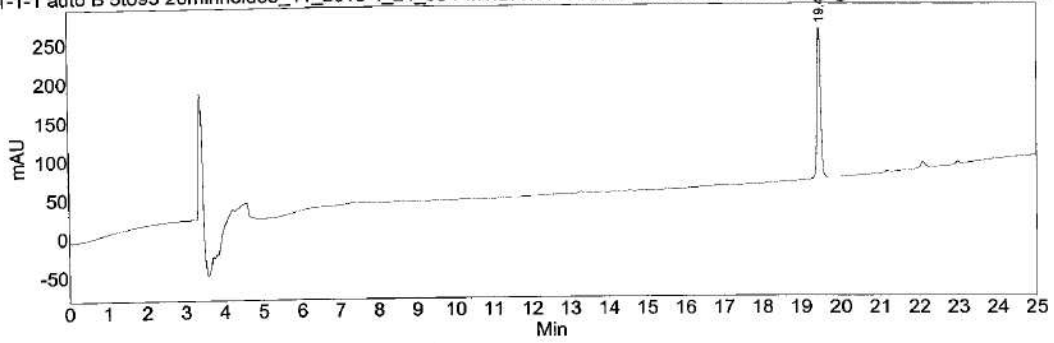

| Index | Name    | Time [Min] | Quantity [% Area] | Height [mAU] | Area [mAU.Min] | Area % [%] |
|-------|---------|------------|-------------------|--------------|----------------|------------|
| 1     | UNKNOWN | 19.48      | 100.00            | 193.2        | 20.5           | 100.000    |
| Total |         |            | 100.00            | 193.2        | 20.5           | 100.000    |

# Compound 29

## Chromatogram : 13646-32 fr 50 auto B 5to95 20minhold53\_14\_2013 6\_29\_28 PM1\_

System : autosampler Prostar 410-210-335-ELSD  
Method : auto B 5 to 95 over 20 min  
User : Carla

Acquired : 3/14/2013 6:30:38 PM  
Processed : 3/15/2013 10:02:21 AM  
Printed : 9/25/2013 5:23:52 PM

13646-32 fr 50 auto B 5to95 20minhold53\_14\_2013 6\_29\_28 PM1.DATA - Prostar 335 Absorbance Analog Channel 1 EL06059071

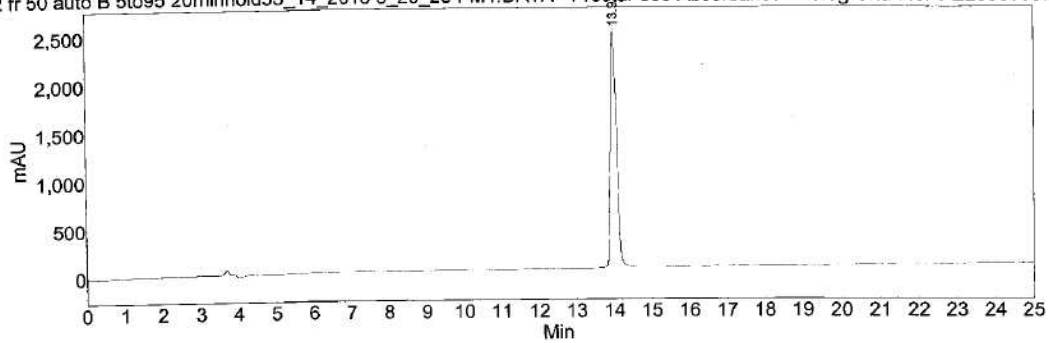

| Index | Name    | Time [Min] | Quantity [% Area] | Height [mAU] | Area [mAU.Min] | Area % [%] |
|-------|---------|------------|-------------------|--------------|----------------|------------|
| 1     | UNKNOWN | 13.97      | 100.00            | 2442.8       | 467.3          | 100.000    |
| Total |         |            | 100.00            | 2442.8       | 467.3          | 100.000    |

# Compound 30

## Chromatogram : 13646-34PREPFR69 auto B 5to95 20minhold53\_28\_2013 1\_49\_1

System : autosampler Prostar 410-210-335-ELSD  
Method : auto B 5 to 95 over 20 min  
User : Carla

Acquired : 3/28/2013 1:50:22 PM  
Processed : 3/28/2013 3:43:32 PM  
Printed : 9/25/2013 5:25:32 PM

346-34PREPFR69 auto B 5to95 20minhold53\_28\_2013 1\_49\_14 PM1.DATA - Prostar 335 Absorbance Analog Channel 1 EL060591

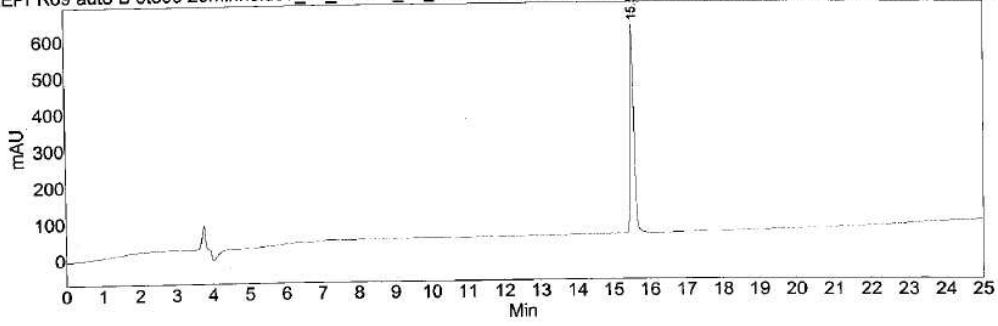

| Index | Name    | Time [Min] | Quantity [% Area] | Height [mAU] | Area [mAU.Min] | Area % [%] |
|-------|---------|------------|-------------------|--------------|----------------|------------|
| 1     | UNKNOWN | 15.52      | 100.00            | 569.6        | 70.1           | 100.000    |
| Total |         |            | 100.00            | 569.6        | 70.1           | 100.000    |
